1 **Abscisic Acid Increases Hydrogen Peroxide in Mitochondria to Facilitate Stomatal Closure**

2

3 **Running Head:** ABA increases H<sub>2</sub>O<sub>2</sub> in guard cell mitochondria

4

5 **Anthony E. Postiglione and Gloria K. Muday\***

6 Department of Biology and the Center for Molecular Signaling, Wake Forest University,  
7 Winston Salem, NC, USA 27109

8

9 **\* Correspondence:**

10 Gloria Muday

11 [muday@wfu.edu](mailto:muday@wfu.edu)

12

13 **One sentence summary:** Genetically encoded biosensors and chemical probes revealed ABA-  
14 dependent increases in hydrogen peroxide, a reactive oxygen species with signaling activity, in  
15 guard cell cytoplasm and mitochondria.

16

17 **Keywords:** guard cell, reactive oxygen species, abscisic acid, mitochondria, respiratory  
18 burst oxidase homolog (RBOH)

19 The author(s) responsible for distribution of materials integral to the findings presented in this  
20 article in accordance with the policy described in the Instructions for Authors  
21 (<https://academic.oup.com/plphys/pages/general-instructions>) is Gloria K. Muday  
22 ([muday@wfu.edu](mailto:muday@wfu.edu))

23

24 **Abstract**

25 Abscisic acid (ABA) drives stomatal closure to minimize water loss due to transpiration in  
26 response to drought. We examined the subcellular location of ABA increased accumulation of  
27 reactive oxygen species (ROS) in guard cells that drive stomatal closure. ABA-dependent  
28 increases in fluorescence of the generic ROS sensor, dichlorofluorescein (DCF), were observed  
29 in mitochondria, chloroplasts, cytosol, and nuclei. The ABA response in all these locations were  
30 lost in an ABA-insensitive quintuple receptor mutant. The ABA-increased fluorescence in  
31 mitochondria of both DCF and an H<sub>2</sub>O<sub>2</sub>-selective probe, Peroxy Orange 1 (PO1), colocalized  
32 with Mitotracker Red. ABA treatment of guard cells transformed with the genetically-encoded  
33 H<sub>2</sub>O<sub>2</sub> reporter targeted to the cytoplasm (roGFP2-Orp1), or mitochondria (mt-roGFP2-Orp1),  
34 revealed H<sub>2</sub>O<sub>2</sub> increases. Consistent with mitochondrial ROS changes functioning in stomatal  
35 closure, we found that guard cells of a mutant with mitochondrial defects, *abo6*, have elevated  
36 ABA-induced ROS in mitochondria and enhanced stomatal closure. These effects were  
37 phenocopied with rotenone, which increased mitochondrial ROS. In contrast, the  
38 mitochondrially targeted antioxidant, MitoQ, dampened ABA effects on mitochondrial ROS  
39 accumulation and stomatal closure in Col-0 and reversed the guard cell closure phenotype of the  
40 *abo6* mutant. ABA-induced ROS accumulation in guard cell mitochondria was lost in mutants in  
41 genes encoding Respiratory Burst Oxidase Homolog (RBOH) enzymes and reduced by treatment  
42 with the RBOH inhibitor VAS2870, consistent with RBOH machinery acting in ABA-increased  
43 ROS in guard cell mitochondria. These results demonstrate that ABA elevates H<sub>2</sub>O<sub>2</sub>  
44 accumulation in guard cell mitochondria to promote stomatal closure.

45

## 46 **Introduction**

47 Drought stress negatively impacts plant growth due to excess water loss, which is a growing  
48 concern for crop yields as a result of the changing global climate (Fahad et al., 2017). Stomatal  
49 closure reduces excess water loss but also limits CO<sub>2</sub> entry, thereby negatively impacting the  
50 photosynthetic rate (Lamaoui et al., 2018). Due to this tradeoff, stomatal aperture must be tightly  
51 controlled (Nilson and Assmann, 2007). Reduction in guard cell turgor to close stomata is  
52 mediated by the hormone abscisic acid (ABA), which signals in guard cells during states of  
53 decreased water availability (Xu et al., 2016; Li et al., 2017; Qi et al., 2018; Qu et al., 2018;  
54 Töldsepp et al., 2018).

55 The binding of ABA to the PYR/PYL/RCAR family of soluble receptors initiates an ABA  
56 signaling cascade (Park et al., 2009). The ABA bound receptors form a complex with Clade A  
57 protein phosphatases type 2C (PP2Cs), which negatively regulate ABA signaling in the absence  
58 of the hormone (Hsu et al., 2021). Formation of this complex inhibits PP2C activity, releasing  
59 the negative regulation of the pathway (Ma et al., 2009; Park et al., 2009; Nishimura et al.,  
60 2010). Reduced phosphatase activity allows for increased phosphorylation of a variety of  
61 proteins including Sucrose nonfermenting Related Kinase 2 family members (SnRK2s)  
62 (Takahashi et al., 2020). Active SnRK2s can then further promote the signaling cascade through  
63 phosphorylation of a number of downstream targets including Respiratory Burst Oxidase  
64 Homologs (RBOH) enzymes, also called NADPH oxidase (NOX) enzymes (Sirichandra et al.,  
65 2009). Consistent with RBOH activation, ROS accumulation in guard cells following ABA  
66 treatment has been observed in multiple plant species (Pei et al., 2000; Kwak et al., 2003;  
67 Watkins et al., 2014; Watkins et al., 2017). These elevated ROS act as second messengers that  
68 lead to decreases in H<sup>+</sup>-ATPase activity and K<sup>+</sup> uptake, while increasing efflux of K<sup>+</sup>, Cl<sup>-</sup>, and  
69 malate. This results in the reduction of guard cell turgor, and closure of the stomatal pore (Geiger  
70 et al., 2009; Jezek and Blatt, 2017; Demidchik, 2018; Klejchova et al., 2021).

71 ROS bursts resulting from RBOH activation have been characterized in plants in response to a  
72 myriad of developmental and environmental signals (Chapman et al., 2019; Martin et al., 2022).  
73 These enzymes function in the production of extracellular superoxide through the transfer of  
74 electrons from NADPH or FADH<sub>2</sub> to molecular oxygen (Suzuki et al., 2011). Superoxide may be  
75 rapidly converted to H<sub>2</sub>O<sub>2</sub> spontaneously or by enzymatic means via superoxide dismutases

76 (Fukai and Ushio-Fukai, 2011). Extracellular H<sub>2</sub>O<sub>2</sub> may then enter plant cells through plasma  
77 membrane localized aquaporins (Bienert et al., 2007; Tian et al., 2016; Rodrigues et al., 2017).  
78 The Arabidopsis genome encodes 10 RBOH family members (RBOHA-RBOHJ) with distinct  
79 expression patterns and functions that regulate a variety of developmental and cellular processes  
80 (Chapman et al., 2019). Genetic approaches have identified a role for RBOHF during ABA-  
81 induced stomatal closure (Kwak et al., 2003). Both the *rboh*f single mutant and the *rboh*d/f  
82 double mutant displayed a reduction in both ABA-driven ROS increases and stomatal closure as  
83 compared to wild-type guard cells (Kwak et al., 2003).

84 Insight into the subcellular localization of where ROS accumulates in guard cells after ABA  
85 treatment, as well as the type of ROS that are increased, are needed to fully understand how  
86 these molecules function in ABA signaling. Prior studies examining ABA-dependent increases in  
87 ROS accumulation have largely examined changes in fluorescence of dichlorofluorescein (DCF),  
88 the cleavage product of CM 2,7-dihydrodichlorofluorescein diacetate (CM H<sub>2</sub>DCF-DA), a cell  
89 permeable generic ROS sensor (Pei et al., 2000; Zhang et al., 2001; Kwak et al., 2003; An et al.,  
90 2016; Wu et al., 2017), which does not reveal which types of ROS are increased by ABA  
91 (Kalyanaraman et al., 2012; Winterbourn, 2014). Prior work has shown that the transcriptional  
92 responses downstream from ROS signals appear to hold a level of specificity not only based on  
93 what type of ROS is being sensed, but also where a given ROS is being generated (Gadjev et al.,  
94 2006). While redox changes in plants have been characterized in response to a myriad of  
95 environmental responses in multiple tissues, studies providing details on the type of ROS  
96 produced and where the ROS are accumulating are sparse. Therefore, there are still many  
97 questions remaining that require ROS detection methodology that can allow visualization of  
98 specific types of ROS in a particular subcellular compartment. While this is a difficult task given  
99 the highly reactive nature of these molecules, excellent advancements have been made in both  
100 microscopic resolution and ROS detection using chemical or genetically encoded sensors, with  
101 the roGFP2-Orp1 bioreporter providing significant insight into the localization of hydrogen  
102 peroxide (Dickinson et al., 2010; Winterbourn, 2014; Nietzel et al., 2019; Ugalde et al., 2021).  
103 Together these tools have provided the ability to gain better insight into this spatial accumulation  
104 of different ROS species in response to environmental stresses, hormone signaling and  
105 development.

106 This study examined how ABA affects the accumulation and localization of H<sub>2</sub>O<sub>2</sub> within  
107 Arabidopsis guard cells during the ABA response and how each of these intracellular  
108 compartments contribute to total ROS changes that drive stomatal closure. The subcellular  
109 distribution of the general ROS sensor, DCF, was examined across multiple subcellular locations  
110 including the guard cell chloroplasts, cytosol, nuclei, and cytosolic puncta that we identified as  
111 mitochondria. To verify that the compartmentalized ROS changes were directly tied to ABA  
112 signaling, we examined these ROS changes in an ABA quintuple mutant. To determine if H<sub>2</sub>O<sub>2</sub>  
113 increases in response to ABA, both Peroxy Orange 1, a chemical probe selective for H<sub>2</sub>O<sub>2</sub>, and  
114 the roGFP2-Orp1 genetically encoded hydrogen peroxide sensor, which was targeted to either  
115 the cytosol, mitochondria, or chloroplast, were used to provide insight into changes in this  
116 signaling ROS. Genetic and pharmacological approaches were also used to manipulate  
117 mitochondrial ROS production to test the role of this localized ROS in ABA-dependent stomatal  
118 closure. This combination of chemical, genetic, and imaging approaches reveals that ABA  
119 increases H<sub>2</sub>O<sub>2</sub> in guard cell mitochondria and that ROS increases within this organelle play a  
120 necessary role in ABA-induced stomatal closure.

## 121 **Results**

### 122 **ABA Signaling Drives Compartmentalized ROS Increases within Guard Cells**

123 ABA-induced ROS increases within Arabidopsis guard cells, were verified through  
124 quantification of fluorescence intensity changes using a generic ROS-responsive fluorescent  
125 probe. We utilized CM 2,7-dihydrodichlorofluorescein diacetate (CM H<sub>2</sub>DCF-DA), which is a  
126 frequently utilized fluorescent chemical probe to monitor changes in ROS accumulation  
127 (Halliwell and Whiteman, 2004). CM H<sub>2</sub>DCF-DA diffuses across the plasma membrane, where  
128 it is trapped within the cell after cleavage by cellular esterases (Swanson et al., 2011). The probe  
129 is then converted to the highly fluorescent DCF upon oxidation by ROS. Whole leaves of Col-0  
130 were excised in the morning, epidermal peels were prepared, and then covered with a stomatal  
131 opening solution for 3 hrs under white light to fully open stomata. This was followed by  
132 incubation with 20 μM ABA or a control treatment for 45 min. Treatments were then removed  
133 and leaf peels were incubated with CM H<sub>2</sub>DCF-DA for 15 min. Laser scanning confocal  
134 microscope (LSCM) images of guard cells with control or ABA treatment with the images of  
135 DCF fluorescence are shown directly and after conversion to lookup tables (LUT), which

136 clarifies the range of fluorescence across these cells, with representative images shown in  
137 Supplemental Figure S1A. Whole stomata DCF fluorescence was recorded in 30 or more stomata  
138 per treatment and each individual value was normalized relative to the average signal intensity of  
139 control buffer treated stomata. This quantification confirmed that ABA significantly increased  
140 DCF fluorescence in guard cells during ABA-induced stomatal closure (Supplemental Figure  
141 S1B).

142 The images in Supplemental Figure S1 suggest that ABA increases DCF signal in a number of  
143 distinct subcellular locations. We therefore performed high resolution imaging of Col-0 guard  
144 cells in the presence and absence of 20  $\mu$ M ABA for 45 min to identify the location within the  
145 cell that ABA signaling increased ROS. ABA treatment increased DCF fluorescence within  
146 multiple subcellular regions (Figure 1). The DCF signal increases in the chloroplast and nucleus  
147 were verified through spectral unmixing of the DCF signal from chlorophyll autofluorescence  
148 and DAPI fluorescence, respectively (Supplemental Figure S2A-B). DCF fluorescence is largely  
149 excluded from the vacuole, but there are increases in DCF signal after ABA treatment in the  
150 chloroplasts, cytosol, nucleus, and small cytosolic punctate structures (Figure 1A), which we  
151 identified as mitochondria in experiments described below. To determine how each of these  
152 subcellular regions contribute to overall ROS changes, we quantified increases in each of these  
153 locations. Following 45 minutes of 20  $\mu$ M ABA treatment we observed the largest increases  
154 within the mitochondria and chloroplasts at 1.5-fold and 1.8-fold, respectively, as compared to  
155 control treated guard cells (Figure 1B-C). We also observed significant increases in other  
156 locations with a 1.3-fold ABA-induced increase within guard cell nuclei (Figure 1D), and a 1.4-  
157 fold increase in the cytosolic signal (Figure 1E).

158 To determine whether these subcellularly localized ABA-induced ROS changes were  
159 downstream of the canonical ABA signaling pathway, we also examined the response in the  
160 ABA quintuple receptor mutant (*pyl-11458*). The DCF fluorescence in the mitochondria,  
161 nucleus, and cytoplasm were no longer significantly different between buffer and ABA treatment  
162 in the *pyl-11458* mutant. In the chloroplasts, the magnitude of the ABA-dependent increase was  
163 reduced relative to Col-0, although there was still a significant difference in response to ABA  
164 treatment (Figure 1B-E). These data suggest that ABA increased ROS in several intracellular

165 locations within guard cells, however DCF cannot resolve which reactive oxygen species  
166 increases.

### 167 **ABA Increases H<sub>2</sub>O<sub>2</sub> in Subcellular Regions Including Chloroplasts and Mitochondria to** 168 **Induce Stomatal Closure**

169 To ask whether hydrogen peroxide (H<sub>2</sub>O<sub>2</sub>) is the ROS that increases in response to ABA, we  
170 utilized the H<sub>2</sub>O<sub>2</sub>-selective chemical probe, Peroxy Orange 1, (PO1) (Dickinson et al., 2010)  
171 which is a membrane-permeable, boronate-based probe that becomes fluorescent upon  
172 irreversible oxidation by H<sub>2</sub>O<sub>2</sub>. The spectral profile of PO1 was isolated and unmixed from leaf  
173 auto-fluorescence, including chloroplasts, and the signal in the absence and presence of ABA is  
174 shown in Figure 2A. Treatment with 20 μM ABA significantly increased PO1 signal in the  
175 chloroplasts but did not result in a significant increase in the mitochondria (Figure 2B-C),  
176 nucleus, or cytosol (Supplemental Figure S3). To determine if higher concentrations of ABA  
177 were sufficient to stimulate H<sub>2</sub>O<sub>2</sub> increases throughout guard cells, we increased concentration of  
178 ABA to 100 μM.

179 Following treatment with 100 μM ABA, we observed a small but significant increase in PO1  
180 signal within mitochondria (Figure 2B) as well as a significant increase in PO1 signal in  
181 chloroplasts (Figure 2C). However, PO1 signal in the cytosol and nucleus were once again not  
182 significantly different from control treatments (Supplemental Figure S3C-D). This suggests that  
183 PO1 may not be taken up by all organelles or that PO1 may not be sensitive enough to detect the  
184 H<sub>2</sub>O<sub>2</sub> changes displayed in certain subcellular locations.

185 To verify that PO1 fluorescence is ROS responsive in the nucleus, we treated guard cells with  
186 250 μM exogenous H<sub>2</sub>O<sub>2</sub> (Supplemental Figure S4A-C). Treatment with exogenous H<sub>2</sub>O<sub>2</sub>  
187 resulted in a 1.5-fold increase in nuclear PO1 fluorescence indicating that PO1 can be  
188 sufficiently taken up by Arabidopsis guard cell nuclei to detect large increases in H<sub>2</sub>O<sub>2</sub>  
189 (Supplemental Figure S4C). The effect of this exogenous H<sub>2</sub>O<sub>2</sub> treatment on stomatal closure  
190 was quantified in Supplemental Figure S4B. Treatment with exogenous H<sub>2</sub>O<sub>2</sub> for 30 minutes was  
191 sufficient to close stomata to levels consistent with ABA-dependent closure. Together, these  
192 results suggest that H<sub>2</sub>O<sub>2</sub> can function as the ROS to close stomata, but that ABA-induced  
193 increases in H<sub>2</sub>O<sub>2</sub> in guard cells may need more sensitive tools than PO1 for their detection.



194 In the chloroplast, we observed ABA-induced PO1 accumulation into distinct structures within  
195 inner chloroplast compartments. However, two-dimensional images of maximum intensity  
196 projection make it difficult to discern if these dyes are associated with the chloroplast membrane,  
197 or internal to this organelle. Therefore, we created three-dimensional renderings of PO1 labeled  
198 guard cells to gain insight into chloroplast PO1 distribution (Supplemental Figure S5). These  
199 renderings show that bright PO1 regions span the chloroplast and are not just on the surface,  
200 revealing a complex ROS accumulation pattern within the chloroplast while the mitochondria are  
201 circular structures with uniform PO1 signal. The PO1 localized signal is similar in position and  
202 size to the accumulation of starch grains (Leshem and Levine, 2013), though we cannot currently  
203 rule out that the complex accumulation pattern of PO1 fluorescence in chloroplasts is due to  
204 increased dye sequestration in regions within this organelle.

#### 205 **ABA Treatment Results in DCF Increases within Guard Cell Mitochondria**

206 DCF and PO1 localized to small cytosolic punctate structures in addition to chloroplasts and  
207 nuclei. We used colocalization of chemical ROS probes with fluorescent organelle dyes and an  
208 organelle targeted GFP to ask whether these puncta are ROS producing peroxisomes or  
209 mitochondria (Figure 3). To evaluate whether cytosolic ROS puncta were peroxisomes, we  
210 examined an Arabidopsis transgenic line with a GFP tagged with a type 1 peroxisomal targeting  
211 signal (GFP-PTS1) (Ramón and Bartel, 2010) (Figure 3A). GFP-PTS1 and PO1 have emission  
212 peaks that can be spectrally unmixed. We used the Zen colocalization module to draw ROIs  
213 around cytosolic punctate structures that did not overlay on a chloroplast (Figure 3B). Although  
214 the GFP-PTS1 signal accumulated into punctate structures within the guard cell cytosol, they did  
215 not colocalize with the puncta labeled with PO1 (Figure 3C).

216 To determine whether these puncta colocalize with mitochondria, we labeled Col-0 guard cells  
217 with Mitotracker Red prior to staining with CM H<sub>2</sub>DCF-DA. Figure 3D shows Mitotracker  
218 (magenta), DCF signal (green), and chlorophyll signal (red), separately and in an overlay. All of  
219 the DCF puncta contained Mitotracker red signal. We drew ROIs around more than 40 DCF  
220 puncta (Figure 3E). Also, these structures display higher DCF intensity than most other  
221 localizations which allowed us to use the lowest intensity puncta to define the colocalization  
222 threshold and generate a colocalization graph (Figure 3F). A majority of pixels in the designated  
223 ROIs contain both DCF and Mitotracker Red signals and we calculated the average weighted



224 colocalization coefficient to be 0.96. These results are consistent with the punctate structures  
225 showing ABA-dependent ROS changes being mitochondria.

## 226 **The Genetically-Encoded ROS Biosensor roGFP2-Orp1 Showed Rapid ABA-Dependent** 227 **H<sub>2</sub>O<sub>2</sub> Increases Within Guard Cell Nuclei and Cytosol**

228 Although chemical ROS probes have provided us with a framework to identify subcellular  
229 locations in which ABA drives ROS increases in guard cells, these sensors suffer from  
230 disadvantages such as irreversibility and differential dye uptake into some subcellular  
231 compartments (Martin et al., 2022). Thus, more precise tools are necessary to reliably evaluate  
232 ABA-dependent oxidation in guard cells. Therefore, we evaluated changes in H<sub>2</sub>O<sub>2</sub> using the  
233 genetically encoded biosensor, roGFP2-Orp1, which has enhanced sensitivity relative to PO1,  
234 can be targeted to different subcellular locations, and provides a ratiometric readout that is not  
235 affected by changes in pH (Nietzel et al., 2019). In the presence of H<sub>2</sub>O<sub>2</sub>, the yeast peroxidase  
236 Orp1 protein (also known as glutathione peroxidase 3) becomes oxidized to sulfenic acid (Cys-  
237 SOH) on a reactive cysteine residue that rapidly forms an intramolecular disulfide bond with a  
238 nearby cysteine. This disulfide is then efficiently transferred via thiol-disulfide exchange to a  
239 pair of cysteines on roGFP2, resulting in a conformational change that alters the optical  
240 properties of the fluorophore (Gutscher et al., 2009). When reduced, the sensor has increased  
241 signal intensity after excitation with the 488 nm laser line, while oxidation leads to elevated  
242 signal following 405 nm excitation. Therefore, dividing signal intensity after 405 nm excitation  
243 by intensity following 488 nm excitation provides a ratiometric readout which has an internal  
244 control for expression levels within a particular tissue (Nietzel et al., 2019).

245 To identify the dynamic range of this sensor in guard cells, we treated with 20 mM DTT to  
246 reduce this biosensor, which leads to a low 405/488 fluorescence ratio (Supplemental Figure S6).  
247 In contrast, treatment with 10 mM H<sub>2</sub>O<sub>2</sub> increases protein oxidation leading to an elevated  
248 405/488 fluorescence ratio. To examine the effect of ABA on oxidation of this sensor, we  
249 excised fully mature Arabidopsis leaves containing roGFP2-Orp1 and generated epidermal leaf  
250 peels as described above (Figure 4). The process of generating an epidermal leaf peel is a  
251 mechanical stress, that can increase roGFP2-Orp1 oxidation (Scuffi et al., 2018). We verified  
252 that incubation of the epidermal leaf peels in stomatal opening buffer for 4 h prior to any  
253 treatment allowed oxidation to begin returning to baseline levels. Stomatal opening buffer was

254 removed following equilibration and replaced with a similar solution containing 20  $\mu\text{M}$  ABA or  
255 a control treatment for 45 min. Figure 4A shows the fluorescence of roGFP2-Orp1 guard cells  
256 excited at either 405 or 488 and illustrates that consistent with oxidation of this reporter after  
257 ABA treatment, the fluorescence of a sample excited at 405 is elevated and the fluorescence of  
258 the sample excited at 488 is reduced. The increase in oxidation after ABA treatment is most  
259 evident when the ratio of fluorescence is illustrated as a heat map, with this being generated by  
260 an ImageJ plugin (Fricker, 2016) (Figure 4A). We quantified the effect of ABA treatment in  
261 roGFP2-Orp1 oxidation in whole stomata, which resulted in a 1.4-fold increase in oxidation ratio  
262 when compared to control guard cells (Figure 4B). The dynamic range of the sensor as judged by  
263 DTT and  $\text{H}_2\text{O}_2$  treatment defining the minimum and maximum is noted on the graph in Figure  
264 4B-4E. These data are consistent with ABA driving an increase in guard cell  $\text{H}_2\text{O}_2$  during  
265 stomatal closure.

266 A potential benefit of using this genetically encoded sensor is the ability to monitor changes in  
267  $\text{H}_2\text{O}_2$  within individual guard cells over time to gain insights into the spatial dynamics of ABA-  
268 dependent increases in  $\text{H}_2\text{O}_2$ . The changing sensor oxidation over time in these guard cells  
269 treated with ABA and then treated with DTT to reverse this oxidation is shown in Supplemental  
270 Figure S7A. The challenge of continuous illumination of the same guard cells is that it can lead  
271 to light-induced oxidation of the sensor due to excitation of chloroplasts leading to increases in  
272  $\text{H}_2\text{O}_2$  (Ugalde et al., 2021). Consistent with this prior report, we can initially detect differences in  
273 sensor oxidation between ABA treated and buffer control samples, but after 30 minutes of  
274 imaging, the amount of oxidation of the sensor in the control became similar to the ABA-induced  
275 oxidation (Supplemental Figure S7B). Therefore, rather than time course imaging, we minimized  
276 the effect of light on sensor oxidation by imaging multiple different samples at several time  
277 points as we did previously with chemical probes.

278 To examine the temporal dynamics of  $\text{H}_2\text{O}_2$  accumulation within the cytosol and nucleus  
279 following ABA treatment, we monitored shifts in oxidation ratio within guard cells transformed  
280 with roGFP2-Orp1 by drawing ROIs in these locations. Although this roGFP2-Orp1 protein  
281 fusion is targeted to the cytosol, the biosensor also shows signal in the guard cell nucleus  
282 (Nietzel et al., 2019; Babbar et al., 2021), allowing us to also monitor  $\text{H}_2\text{O}_2$  changes in this  
283 organelle. Leaves expressing roGFP2-Orp1 were peeled and equilibrated in stomatal opening

284 solution as described above. Opening buffer was then removed following equilibration and  
285 replaced with 20  $\mu$ M ABA for 0, 15, 30, or 45 min (Figure 4C). Though roGFP2-Orp1 was still  
286 slightly oxidized in both the cytosol and nucleus after 4 hr incubation in stomatal opening  
287 solution, treatment with 20  $\mu$ M ABA resulted in a significant increase in oxidation above  
288 baseline in both locations within 15 min (Figure 4D-E). ABA treatment led to continued  
289 oxidation of the sensor in a time-dependent manner, reaching a maximum of 1.4-fold increase  
290 over control in the cytosol and 1.5-fold in the nucleus at 30 min with the oxidation ratio  
291 beginning to decrease at 45 mins (Figure 4C-E).

### 292 **ABA Treatment Increases the Oxidation of roGFP2-Orp1 targeted to the Mitochondria** 293 **and Chloroplast**

294 To confirm that ABA perception drives H<sub>2</sub>O<sub>2</sub> accumulation in guard cell mitochondria, we  
295 examined a transgenic line expressing roGFP2-Orp1 specifically in the mitochondrial matrix  
296 (mt-roGFP2-Orp1) (Nietzel et al., 2019) (Figure 5). To minimize oxidation due to generation of  
297 the leaf peel, we equilibrated samples in stomatal opening solution for 4 hours before imaging.  
298 We determined the dynamic range of this reporter using DTT to fully reduce the reporter and  
299 H<sub>2</sub>O<sub>2</sub> to fully oxidize it, as shown in Supplemental Figure 9 and Figure 5B. It is evident that the  
300 signal of this reporter is dispersed in puncta throughout the cytosol, which is most evident in the  
301 H<sub>2</sub>O<sub>2</sub> treated samples. Since the emission spectra of GFP following excitation with its optimal  
302 wavelength (488 nm) is easily unmixed from that of PO1 emission at the same excitation  
303 wavelength, we utilized this sensor to verify that PO1 labeled puncta were also identified as  
304 mitochondria through colocalization of these two signals (Supplemental Figure S8).

305 Treatment with 20  $\mu$ M ABA resulted in a significant increase in this mitochondrial sensor at 45  
306 minutes after ABA treatment (Figure 5B). It is of note that the mt-roGFP2-Orp1 oxidation state  
307 across the entire mitochondrial population is less uniform than with the sensor targeted to the  
308 cytoplasm (Figure 5C). This may be responsible for the lower magnitude change in response to  
309 ABA in mt-roGFP2-Orp1 as compared to the ABA increase mitochondrial signal of chemical  
310 ROS probes.

311 We also examined the effect of ABA on roGFP2-Orp1 targeted to the chloroplast (plastid-  
312 roGFP2-Orp1) (Ugalde et al., 2021). We did detect a significant increase in sensor activity,  
313 supporting our result with chemical sensors (Supplemental Figure S10). However, ABA induced

314 a lower magnitude response in this reporter than seen via DCF, suggesting another ROS type or  
315 disproportionate localization of the chemical probe to this organelle. The magnitude of the ABA  
316 changes in these two sensors in the mitochondria and chloroplasts cannot be directly compared  
317 because of multiple technical differences, but in both organelles we see ABA responses  
318 mirroring that seen with chemical reporters of ROS changes. Altogether, these results use a  
319 sophisticated biosensor to demonstrate that ABA increases H<sub>2</sub>O<sub>2</sub> with similar spatial and  
320 temporal responses to ROS changes detected with chemical sensors, strengthening evidence for  
321 ROS as second messengers in ABA-dependent stomatal closure.

### 322 **Mutations or Treatments that Alter Mitochondrial ROS Accumulation Influence ABA-** 323 **Dependent Stomatal Closure**

324 To evaluate the function of ABA-induced ROS in guard cell mitochondria, we searched for  
325 mutants with altered ABA response tied to mitochondrial function. The ABA overly sensitive 6  
326 (*abo6*), was identified in a genetic screen evaluating the ability of ABA to inhibit primary root  
327 elongation (He et al., 2012). Consistent with an enhanced response to ABA, this mutant  
328 displayed drought tolerance (He et al., 2012). The *abo6* mutation maps to a gene encoding a  
329 mitochondrial DEXH box RNA helicase that functions in the splicing of several transcripts that  
330 are required for proper function of complex I in the mitochondrial electron transport chain and  
331 the protein product of this gene is only expressed in mitochondria (He et al., 2012). Because  
332 complex I is a major source of ROS production, impairment at this site can result in increased  
333 electron leakage and thus elevated mitochondrial ROS. To ask whether the *abo6* mutant was also  
334 enhanced in ABA response in guard cells, we examined the levels of DCF fluorescence in the  
335 mitochondria in guard cells of *abo6* (Figure 6A), finding that *abo6* contained 1.3-fold higher  
336 levels of DCF fluorescence in guard cell mitochondria when compared to Col-0 under control  
337 conditions. Additionally, ABA treatment yielded 1.2-fold higher DCF signal in the *abo6* mutant  
338 background than in Col-0 and had a larger ABA response as compared to its untreated control  
339 than Col-0 (Figure 6B). These results demonstrate that *abo6* has an enhanced ABA response in  
340 guard cells, consistent with the elevated root ABA responses.

341 To examine the effect of mitochondrial ROS on guard cell ABA sensitivity, we examined ABA-  
342 induced stomatal closure in *abo6* guard cells and in Col-0 guard cells with pharmacological  
343 perturbations of mitochondrial ROS (Figure 6C). Here we utilized rotenone, an inhibitor of

344 complex I in the mitochondrial electron transport chain (Palmer et al., 1968) and can result in  
345 increased electron leakage out of complex I and ultimately increased accumulation of  
346 mitochondrial ROS (Li et al., 2003; Zhou et al., 2014; Mohammed et al., 2020). We also used the  
347 mitochondrially targeted antioxidant MitoQ (Kelso et al., 2001), to determine its effect on ABA  
348 increased oxidation of mt-roGFP2-Orp1. We treated guard cells with 500 nM MitoQ in advance  
349 of ABA treatment. This treatment abolished the ABA-induced increase in mt-roGRP2-Orp1  
350 fluorescence (Figure 6D). We were unable to find reports of this inhibitor being used in plants,  
351 suggesting that its specificity toward mitochondria in photosynthetic organisms has not been  
352 adequately tested. MitoQ has structural similarity with plastoquinone found in the chloroplast, so  
353 we examined MitoQ's effect on ABA-dependent oxidation of plastid-roGFP2-Orp1. MitoQ lead  
354 to a reduction in the oxidation of chloroplast plastid-roGFP2-Orp1 sensor as compared to the  
355 ABA only treatment, but not to levels of untreated leaves (Supplemental Figure S11). This  
356 MitoQ effect was substantially smaller than the effect on the mitochondrial sensor, which  
357 completely reversed the effect of ABA resulting in levels of sensor oxidation that were lower  
358 than in the absence of ABA treatment (Figure 6D).

359  
360 To evaluate the effect of Mito Q on stomatal closure, leaves were excised and peeled and then  
361 pretreated with either stomatal opening buffer as described previously, 500 nM MitoQ for 3 hrs,  
362 or 50  $\mu$ M rotenone for 1 hr. Epidermal peels were then treated with 20  $\mu$ M ABA for 0, 15, 30, or  
363 45 min and guard cells were immediately imaged (Figure 6C). Initial apertures after incubation  
364 in opening solution showed a slight difference between Col-0 and *abo6* prior to any ABA  
365 treatment, consistent with the elevated levels of baseline mitochondrial ROS observed in Figure  
366 6B. Following 20  $\mu$ M ABA treatment, *abo6* showed a significant increase in ABA dependent  
367 closure relative to Col-0. Unlike *abo6*, rotenone pre-treatment alone did not significantly alter  
368 initial stomatal aperture measurements prior to treatment with ABA. However, rotenone pre-  
369 treatment significantly increased the amount of stomatal closure over the 45-minute time course  
370 of ABA treatment. We also examined the effect of pretreatment with MitoQ on stomatal closure,  
371 finding that it significantly reduced ABA-dependent stomatal closure in Col-0 and was able to  
372 rescue the hypersensitive ABA response in *abo6* guard cells so that the stomatal aperture was not  
373 significantly different from Col-0 (Figure 6E). These findings are consistent with ABA driving

374 ROS increases in guard cell mitochondria and that the degree of ABA sensitivity is correlated  
375 with the amount of ROS production within this organelle.

376

### 377 **Mutants Deficient in *rboh*d and *rboh*f Have Impaired ABA-Induced ROS Accumulation in** 378 **Several Subcellular Locations**

379 RBOH enzymes are well-characterized producers of signaling ROS that regulate a myriad of  
380 plant developmental processes and environmental responses (Chapman et al., 2019). To  
381 determine whether RBOH enzymes are linked to the increase in ROS accumulation in  
382 mitochondria following ABA treatment, we examined DCF fluorescence in Arabidopsis mutants  
383 with defects in the genes encoding RBOHD and RBOHF, which were previously reported to  
384 function in ABA-induced stomatal closure (Kwak et al., 2003). Figure 7A contains images of  
385 DCF fluorescence reported as lookup tables in Col-0 and the double mutant *rboh*d/*f*. The *rboh*d/*f*  
386 double mutant not only exhibited reduced DCF accumulation in the cytosol (Supplemental  
387 Figure 12) following 20  $\mu$ M ABA treatment for 45 minutes (as predicted by the known function  
388 of RBOH proteins in controlling cytosolic ROS), but we also failed to observe a significant  
389 increase in signal within the mitochondria of this mutant (Figure 7B).

390 We also inhibited RBOH-dependent ROS production with a pharmacological approach.  
391 Although diphenylene iodonium (DPI) is a commonly used NADPH-oxidase inhibitor that  
392 inhibits ABA dependent guard cell closure in guard cells (Zhang et al., 2001; Gayatri et al.,  
393 2017; Watkins et al., 2017), the molecule is a general flavoprotein inhibitor that can directly  
394 interfere with metabolic processes in mitochondria (Augsburger et al., 2019). Therefore, we  
395 utilized the more selective pan NOX inhibitor VAS2870, which selectively targets an active-site  
396 cysteine that is conserved in mammalian NOX enzymes and plant RBOHs (Yun et al., 2011). We  
397 confirmed that VAS2870 regulated ABA responses in guard cells by evaluating its effect on  
398 ABA-induced stomatal closure. Pre-treatment with 10  $\mu$ M VAS2870 for 1 hr prior to ABA  
399 treatment was able to significantly inhibit ABA-dependent stomatal closure compared to guard  
400 cells treated with ABA alone, suggesting it is an effective RBOH inhibitor in guard cells  
401 (Supplemental Figure S12A-B) and supporting the requirement of RBOH activity for full ABA-  
402 induced stomatal closure. Pre-incubation with VAS2870 abolished ABA-induced ROS increases  
403 in both the mitochondria (Figure 7B) and the cytosol (Supplemental Figure 12). We also



404 pretreated mt-roGFP2-Orp1 guard cells with VAS2870 to verify that the ABA-dependent  
405 increases in mitochondrial oxidation seen previously were diminished by inhibitor treatment  
406 (Figure 7C). Altogether, these findings indicate that RBOH enzymes play a role in ABA-  
407 dependent ROS accumulation in guard cell mitochondria.

## 408 **Discussion**

409 Plants regulate stomatal aperture in response to environmental and hormonal signals through the  
410 control of guard cell turgor pressure (Nilson and Assmann, 2007). During drought stress, plants  
411 increase ABA synthesis (Muhammad Aslam et al., 2022), which initiates a complex signaling  
412 pathway that ultimately leads to stomatal closure (Vishwakarma et al., 2017). Included in this  
413 signaling cascade is the activation of RBOH enzymes that trigger a burst of ROS that act as  
414 second messengers in guard cell closure (Kwak et al., 2003). The accumulation of ROS in guard  
415 cells following ABA treatment has been detected primarily by increases in DCF fluorescence, a  
416 nonspecific chemical ROS sensor, with signal quantified across the whole guard cell (Pei et al.,  
417 2000; Watkins et al., 2014; Watkins et al., 2017; Postiglione and Muday, 2020). However,  
418 signaling through ROS increasingly appears to be much more nuanced, with signaling outputs  
419 depending on both which ROS is generated and where it is generated (Noctor and Foyer, 2016).  
420 Recent technological advances in microscopic resolution and ROS detection (Winterbourn,  
421 2014; Nietzel et al., 2019; Ugalde et al., 2021), as well as a growing number of genetic resources  
422 to disrupt signaling and/or ROS synthesis allowed us to ask more precise questions about the  
423 functions of ROS, including when and where these are made and which ROS function to control  
424 signaling and development (Martin et al., 2022). In this study, we use both ROS-responsive  
425 fluorescent dyes and genetically encoded biosensors to demonstrate that ABA increases H<sub>2</sub>O<sub>2</sub>  
426 within specific subcellular compartments of guard cells and that these changes are both  
427 necessary and sufficient to drive stomatal closure.

428 We found that ABA significantly increased the fluorescence intensity of the generic ROS probe,  
429 DCF, in the cytoplasm, mitochondria, nuclei, and chloroplasts, with the most substantial  
430 increases in the mitochondria and chloroplast. The identity of these organelles was verified by  
431 linear unmixing DCF signal from organelle localized dyes and chloroplast autofluorescence. The  
432 ABA-induced ROS synthesis in the mitochondria, cytosol, and nucleus were all dependent on the  
433 canonical ABA signaling pathway, as the ABA-increased ROS was lost in these organelles in the



434 quintuple ABA receptor mutant *pyl-11458*. However, ABA was still able to trigger a significant  
435 increase in the chloroplasts of *pyl-11458* suggesting alternate mechanisms for ROS generation in  
436 this organelle during ABA signaling.

437 A major component of these ABA-induced ROS is due to increases in H<sub>2</sub>O<sub>2</sub>. We used the H<sub>2</sub>O<sub>2</sub>-  
438 selective chemical probe, PO1, and the H<sub>2</sub>O<sub>2</sub> responsive genetically-encoded sensor roGFP2-  
439 Orp1, targeted to the cytosol and nucleus, to the mitochondria, or to the chloroplast. This highly  
440 reactive biosensor contains a ratiometric readout which provides advantages over chemical dyes  
441 due to its self-normalizing output (Gutscher et al., 2009; Nietzel et al., 2019; Ugalde et al.,  
442 2021). This sensor has a cysteine residue that is oxidized by H<sub>2</sub>O<sub>2</sub> leading to a conformational  
443 change that alters its optical properties increasing its signal after excitation at 405 nm. Using this  
444 sensor, we reveal that ABA treatment leads to a significant increase in H<sub>2</sub>O<sub>2</sub> when oxidation ratio  
445 in the whole guard cell, cytosol, nucleus, are quantified or when mitochondrial or chloroplast  
446 ROS are quantified using the targeted mt-roGFP-Orp1 or plastid-roGFP-Orp1. We also detected  
447 ABA-dependent increases in H<sub>2</sub>O<sub>2</sub> in the chloroplast and in mitochondria with PO1, but not in  
448 the cytosol. We stained leaves containing the mitochondrially targeted roGFP2-Orp1 with PO1  
449 and confirmed that the mitochondria labeled with PO1 displayed strong colocalization with mt-  
450 roGFP2-Orp1. Together these experiments reveal ABA-dependent H<sub>2</sub>O<sub>2</sub> increases in the  
451 mitochondria and chloroplasts.

452 We used several approaches to ask if mitochondrial ROS increases are able to facilitate ABA  
453 dependent stomatal closure. A previous study screened mutants for altered ABA-dependent  
454 primary root growth (He et al., 2012; Yang et al., 2014). This approach identified the *abo6*  
455 mutant, which was isolated for enhanced ABA response in root cells and had drought tolerance,  
456 and elevated ROS within root cells. The mutant gene encoded a DEXH box RNA helicase,  
457 which led to altered synthesis of mitochondrial electron transport proteins and the gene product  
458 is localized to the mitochondria of leaf protoplasts (He et al., 2012). The *abo6* mutant had  
459 elevated mitochondrial ROS in guard cells with and without ABA treatment and significantly  
460 enhanced ABA-induced stomatal closure relative to Col-0. We also observed enhanced ABA-  
461 sensitivity in Col-0 guard cells pretreated with mitochondrial complex I inhibitor, rotenone,  
462 which also elevates mitochondrial ROS accumulation (Li et al., 2003; Zhou et al., 2014;  
463 Mohammed et al., 2020). Rotenone's mechanism of action made this a particularly intriguing

464 finding as the inhibitor increases mitochondrial ROS while limiting oxidative phosphorylation  
465 and ATP synthesis (Palmer et al., 1968). This suggests that our findings of increased ABA  
466 sensitivity were largely based on the pool of ROS generated in this organelle and not increased  
467 energetic requirements.

468 We also showed that pretreatment with the mitochondrially targeted ROS scavenger, MitoQ  
469 (Kelso et al., 2001), significantly blunted mt-roGFP2-Orp1 oxidation and ABA-induced stomatal  
470 closure in Col-0 guard cells. As we found no other reference to MitoQ use in plants, we also  
471 asked whether it acted on chloroplasts. Although this compound reduced oxidation of the plastid-  
472 roGFP2-Orp1, the effect was smaller than on mt-roGFP2-Orp1. In particular, MitoQ reduced mt-  
473 roGFP2-Orp1 levels to below those of ABA treatment, while plastid-roGFP2-Orp1 was still  
474 significantly oxidized by ABA even after MitoQ pretreatment, suggesting MitoQ has  
475 mitochondrial selectivity.

476 Additionally, a previous reports demonstrated that impairment of chloroplastic ROS generation  
477 through chemical inhibition of photosynthetic electron transport does not have an effect on  
478 ABA-induced stomatal closure (Wang et al., 2016). Another study showed that a mutant that  
479 lacked chlorophyll in guard cells was still able to close stomata following ABA treatment  
480 (Azoulay-Shemer et al., 2015). ABO6 is localized to mitochondria and absent in chloroplast (He  
481 et al., 2012) and MitoQ is able to reverse the enhanced ABA stomatal closure phenotype of *abo6*  
482 to wild-type levels. Together, these results are consistent with mitochondria as necessary sites of  
483 ROS generation for productive ABA signaling in guard cells.

484 RBOH enzymes were previously implicated in ABA-dependent increases in DCF fluorescence  
485 (Kwak et al., 2003; Drerup et al., 2013; Hsu et al., 2018; Postiglione and Muday, 2020) by  
486 examination of an *rbohD/rbohF* double mutant (Kwak et al., 2003) and treatment with a  
487 nonselective RBOH inhibitor, Diphenyleneiodonium (DPI) (Watkins et al., 2017). RBOH  
488 enzymes have well established roles in hormone induced ROS synthesis in mammals (Vermot et  
489 al., 2021) and plants (Chapman et al., 2019). These enzymes produce superoxide in the apoplast,  
490 which can be rapidly dismutated into H<sub>2</sub>O<sub>2</sub> via superoxide dismutase. The influx of H<sub>2</sub>O<sub>2</sub> into the  
491 cytoplasm is facilitated by aquaporins, making it available to reversibly oxidize cytoplasmic  
492 protein targets to change their conformation, activity and/or regulatory properties (Tian et al.,

493 2016; Rodrigues et al., 2017). Yet, whether RBOH enzymes drive ROS accumulation in guard  
494 cells in regions beyond the cytoplasm has not been examined.

495 In guard cells of both an *rbohdf* double mutant and cells treated with a highly specific pan-  
496 RBOH/NOX inhibitor, VAS2870 (Reis et al., 2020), there were reductions in both ABA-induced  
497 cytosolic and mitochondrial ROS and ABA-dependent guard cell closure. This suggests a link  
498 between RBOH-dependent ROS production and ROS accumulation in guard cell mitochondria.  
499 This finding is consistent with a previous report which found that introduction of the *rboh*  
500 mutation into *abo6* relieved ABA hypersensitivity in *abo6* roots (He et al., 2012). This finding  
501 both emphasizes the role of RBOH in ABA-induced ROS in cellular locations beyond the  
502 cytosol, such as mitochondria, which is an important insight into the function of this class of  
503 signaling driven, ROS synthesizing enzymes. Previous work in mammalian systems has shown  
504 the ability of NOX enzymes, such as NOX4, to localize to mitochondria (Dikalov, 2011;  
505 Shanmugasundaram et al., 2017). However, whether there are RBOHs localized to mitochondria  
506 is not currently known in plants.

507 The regulation of stomatal aperture in response to environmental stimuli, such as drought, is a  
508 crucial process in plant adaptation to stress. This study built on prior evidence that ABA drives  
509 ROS increases, identified here as H<sub>2</sub>O<sub>2</sub> as central to this response, as well as revealing the spatial  
510 regulation of these ROS. The addition of genetically encoded biosensors to our toolkit of ROS  
511 responsive chemical probes allowed us to overlay the position of ROS accumulation with  
512 organelle specific markers to reveal ABA-elevated ROS in the mitochondria and chloroplast. In  
513 support of a function of mitochondrially derived ROS in guard cells, in both a mutant with  
514 increased mitochondrial ROS and chemically-increased mitochondrial ROS production displayed  
515 an increased rate of ABA-induced stomatal closure. Meanwhile, a ROS scavenger targeted to  
516 this organelle reduced guard cell ABA sensitivity, suggesting ROS production in this organelle  
517 functions in the ABA signaling pathway. We also demonstrated that RBOH enzymes play a role  
518 in ABA-increased ROS accumulation not only in the cytoplasm, but also guard cell  
519 mitochondria. Together these results indicate that ABA-induced H<sub>2</sub>O<sub>2</sub> accumulation exhibits  
520 tight compartmentalization in organelles such as mitochondria that influences guard cell  
521 signaling and physiology.

522

## 523 **Methods and Materials**

### 524 **Plant Growth Conditions**

525 *Arabidopsis thaliana* seeds that were used include Col-0, *rboh*d/*rboh*f double mutant (Miller et  
526 al., 2009), *pyl1-1*; *pyr1-1*; *pyl4-1*; *pyl5*; *pyl8-1* quintuple mutant (*pyl-11458*) (Zhang et al., 2020)  
527 (ABRC), *ABA overly sensitive 6 (abo6)* (Alonso et al., 2003) (ABRC), GFP-PTS1 reporter  
528 (Ramón and Bartel, 2010), roGFP2-Orp1 (Nietzel et al., 2019), and mt-roGFP2-Orp1 (Nietzel et  
529 al., 2019). *Arabidopsis* plants were germinated on 1× Murashige and Skoog medium, pH 5.6,  
530 Murashige and Skoog vitamins, and 0.8% (w/v) agar, buffered with 0.05% (w/v) MES and  
531 supplemented with 1% (w/v) sucrose. After vernalization at 4°C for 48 h, plates were placed  
532 under 24-h 120  $\mu\text{mol m}^{-2} \text{s}^{-2}$  cool-white light. Seven days after germination, seedlings were  
533 transferred to SunGro Redi-Earth Seed Mix. Plants are then grown under a short-day light cycle  
534 (8 h light/ 16 h dark) of 120  $\mu\text{mol m}^{-2} \text{s}^{-2}$  cool-white light with relative humidity kept between  
535 60-70%. Experiments were conducted on leaves from plants 3 to 4 weeks after germination,  
536 unless noted otherwise.

### 537 **DCF Staining, Imaging, and Quantification**

538 CM 2,7-dihydrodichlorofluorescein diacetate (CM-H<sub>2</sub>DCF-DA) was dissolved in dimethyl  
539 sulfoxide to yield a 50- $\mu\text{M}$  stock. This was diluted in deionized water to yield a final  
540 concentration of 4.3  $\mu\text{M}$  with 0.1% (v/v) dimethyl sulfoxide. Epidermal peels of Col-0, *abo6*, or  
541 *rboh*d/*f* were prepared by evenly spraying a microscope slide with a silicone-based medical  
542 adhesive (Hollister stock #7730). After 10 min, the abaxial epidermis of the leaf was pressed into  
543 the dried adhesive coat, a drop of water was placed on the leaf surface, and the leaf was gently  
544 scraped with a razor blade until only the fixed epidermis remains. Fresh epidermal peels were  
545 then fully covered in opening solution (50 mM KCl, and 10 mM MES buffer, pH 6.15) and  
546 incubated under cool-white light (120  $\mu\text{mol m}^{-2} \text{s}^{-1}$ ) for 3 hrs. For VAS2870 treatments, leaf  
547 opening buffer was then replaced with stomatal opening solution containing 10  $\mu\text{M}$  VAS2870  
548 for 1 hr during the opening process. Epidermal peels were then treated with fresh stomatal  
549 opening buffer (control buffer) or a similar solution containing 20  $\mu\text{M}$  ABA for 45 min. Pre-  
550 treatments were fully removed, and the epidermis was stained for 15 min with 4.3  $\mu\text{M}$  H<sub>2</sub>DCF-

551 DA stain and washed with deionized water. Microscopy was performed on the Zeiss LSM880  
552 laser scanning confocal microscope with a 32-detector GaAsP array for spectral unmixing. The  
553 Plan Apochromat 63x/1.2NA water objective was used for acquisition. The 488 nm laser line  
554 was used to excite the leaf surfaces with 0.4% maximum laser power with a 3.5 digital gain. The  
555 gain settings were optimized to produce maximum DCF signal while preventing oversaturation.  
556 All micrographs were acquired using identical offset, gain, and pinhole settings using the same  
557 detectors for each experiment. Settings were defined to spectrally separate the DCF and  
558 chlorophyll signal by capturing the emission spectrum for each compound in regions which there  
559 was no overlap. Total emission was collected using lambda scanning with a 1 Airy Unit pinhole  
560 aperture yielding a 0.9  $\mu\text{m}$  section, the DCF signal alone would later be unmixed from the image  
561 for quantification.

562 Images used for quantification were taken with averaging of 2 with minimal pixel dwell time  
563 making sure to limit excess exposure to the laser that may induce ROS. Maximum intensity  
564 projections were produced from Z-stacks. The average intensity values within each ROI were  
565 acquired and all values obtained were normalized to the average of each subcellular location  
566 under control conditions from three biological replicates with 2-3 technical replicates per  
567 experiment. DCF fluorescence intensities were measured in ImageJ by drawing ROIs around the  
568 whole stomata, chloroplasts, cytosol, nuclei, and individual mitochondria of multiple guard cells.

569 The images shown in the figures were captured at high resolution using separate but identically  
570 treated samples to those used in the quantification with increased averaging, digital zoom, and  
571 pixel dwell time to increase resolution and were not included in any quantification. Individual  
572 images were selected that were representative of the magnitude of responses in the images  
573 generated for quantification. To produce heat maps, we converted pixel intensities of DCF  
574 fluorescence using the look-up tables (LUT) function in the Zen Blue Software.

### 575 **PO1 Staining, Imaging, and Quantification**

576 Peroxy Orange 1 (PO1) is an  $\text{H}_2\text{O}_2$  sensor, which was dissolved in dimethyl sulfoxide to yield a  
577 5 mM stock. This was diluted in deionized water to yield a final concentration of 50  $\mu\text{M}$ .  
578 Epidermal peels were prepared, and guard cells were fully opened as described above, then  
579 treated with 20  $\mu\text{M}$  or 100  $\mu\text{M}$  ABA or a control buffer. Pre-treatments were fully removed, and

580 the epidermis was stained for 30 min with 50  $\mu$ M PO1 dye and washed with deionized water.  
581 Microscopy was performed via a Zeiss LSM880 laser scanning confocal microscope with a 32-  
582 detector GaAsP array for spectral unmixing. The Plan Apochromat 63x/1.2NA water objective  
583 was used for acquisition. Leaf surfaces were excited with the 488 nm laser line at 0.6%  
584 maximum laser power and a digital gain set to 3.5. The gain settings were optimized to produce  
585 maximum PO1 signal while preventing oversaturation. All micrographs were acquired using  
586 identical offset, gain, and pinhole settings using the same detectors for each experiment. Settings  
587 were defined to spectrally separate the PO1 signal from chlorophyll autofluorescence by  
588 capturing the emission spectrum for each compound in regions where only one signal was  
589 present. Total emission was then collected using lambda scanning with a 1 Airy Unit pinhole  
590 aperture yielding a 0.9  $\mu$ m section, the spectral signature that was previously calculated as PO1  
591 signal alone was later unmixed from the image for quantification.

592 Three-dimensional images of PO1 were acquired on the Zeiss LSM880 system equipped with  
593 32-detector GaAsP array for Airyscan acquisition. Samples were excited with an argon 488 nm  
594 laser line using 6% laser power and a Plan Apochromat 63x/1.2NA water objective was used for  
595 image acquisition. Total emission was collected using Airyscan of a z-stack spanning the entire  
596 depth of a whole guard cell pair, using the optimal optical slice size calculated by the ZEN Black  
597 acquisition software. Images were then rendered in three dimensions using Aivia image analysis  
598 software. x,y and z,y projections were then acquired of cropped regions containing chloroplasts  
599 or mitochondria.

600 To produce heat maps displayed in Figure 2, we converted pixel intensities of PO1 fluorescence  
601 using the look-up tables (LUT) function in the Zen Blue Software. PO1 fluorescence intensities  
602 were measured in ImageJ by drawing ROIs around the chloroplasts, cytosol, nuclei, and  
603 individual mitochondria of each guard cell. Due to there being more puncta with bright PO1  
604 fluorescence evident after ABA treatment, as reported previously in tomato (Watkins et al.,  
605 2017), we obtained a greater number of data points as ABA concentrations increased. The  
606 average intensity values within each ROI were acquired and all values obtained were normalized  
607 to the average of each subcellular location under control conditions from three biological  
608 replicates with three technical replicates per experiment.



## 609 **Colocalization analysis of ROS Chemical Probes with Mitochondria and Peroxisomes**

610 For evaluation of peroxisomal colocalization, Arabidopsis leaves containing PTS1-GFP were  
611 peeled and labeled with 50  $\mu$ M PO1 as described above. For evaluation of mitochondrial  
612 colocalization, Col-0 Arabidopsis leaves were peeled and treated with 8.6  $\mu$ M CM H<sub>2</sub>DCF-DA  
613 as described above and then 1  $\mu$ M Mitotracker Red for 15 min. Leaves were then visualized  
614 using the Zeiss 880 LSCM device as described earlier. Each signal was resolved in lambda  
615 scanning mode, with emission spectra for each individual spectra being obtained prior to  
616 colocalization analysis by imaging single labeled samples. Images were taken at multiple Z-  
617 positions, though not combined into maximum intensity projections as to not misrepresent  
618 colocalization of signals that might be found in the same vertical plane but at different depths.  
619 Emission spectra for each signal were then unmixed from corresponding images to better  
620 evaluate how either signal contributed to a particular location. For colocalization analysis,  
621 samples were examined using the Zeiss Zen colocalization module. The threshold for PO1, GFP-  
622 PTS1, DCF, Mitotracker Red, mt-roGFP2-Orp1 was determined in each image, via regions that  
623 contained only one fluorescent signal. Regions of interest surrounding mitochondria in PO1 or  
624 DCF were then selected and evaluated for colocalization with either GFP-PTS1, mt-roGFP2-  
625 Orp1, or Mitotracker Red. Colocalization was then calculated using Pearson's coefficients  
626 (weighted colocalization coefficients) and respective scatterplots were generated.

## 627 **Imaging and Analysis of ROS-Sensitive Genetically Encoded Biosensors**

628 Fully mature Arabidopsis rosettes containing roGFP2-Orp1, plastid-roGFP2-Orp1, or mt-  
629 roGFP2-Orp1 were excised and peeled prior to being submerged in stomatal opening buffer to  
630 equilibrate for 4 hrs to establish a baseline. For inhibitor treatments, leaf peels were pretreated  
631 with stomatal opening buffer containing either 500 nM mitoquinol mesylate (MitoQ) for 3 hrs, or  
632 10  $\mu$ M VAS2870 for 1 hr during the equilibration process. Inhibitor solutions were then  
633 removed, rinsed, and replaced with fresh stomatal opening buffer and allowed to incubate until  
634 the 4 hr opening period was completed. Stomatal opening buffer or inhibitors were then removed  
635 following equilibration and replaced with a similar solution containing 20  $\mu$ M ABA for 0, 15,  
636 30, or 45 min. Microscopy was performed on the Zeiss LSM880 laser scanning confocal  
637 microscope with a Plan Apochromat 63x/1.2NA water objective was used to sequentially excite



638 leaf surfaces at 405 and 488 nm with 1% maximum laser power. Emission was recorded between  
639 505–535 nm to keep autofluorescence at a minimum, with a 2.4 Airy Unit pinhole aperture  
640 yielding a 2.0  $\mu\text{m}$  section. We verified that there were no changes in the ratiometric signal  
641 calculated with ABA treatment of Col-0 that was not transformed with this biosensor. Images  
642 used for quantification were taken without averaging and with scan speed and pixel dimensions  
643 optimized for minimal pixel dwell time in order to limit laser-induced oxidation of the sensor. Z-  
644 slice number was held constant for all image stacks to promote equity of light exposure (and  
645 equal photooxidation) across samples. Z-axis profiles of averaged intensity within a 3  $\mu\text{m}^2$  spot  
646 size were plotted in ImageJ to verify that both fluorescent channels showed alignment of peak  
647 intensity values at proximal stack depths. This check was critical to assure depth alignment of  
648 our two distinct fluorescent channels given that we utilized maximum intensity projections for  
649 these analyses. Dynamic range of each dye sensor was defined by treating equilibrated samples  
650 with 20 mM DTT or 10 mM  $\text{H}_2\text{O}_2$  to determine the maximum reduction or maximum oxidation,  
651 respectively.

652 Images of roGFP2-Orp1 targeted to the cytosol or plastids were captured as described above and  
653 maximum intensity projections were analyzed in ImageJ by drawing a region of interest in the  
654 nucleus, a cytosolic region, or individual chloroplasts within each guard cell. Images of mt-  
655 roGFP2-Orp1 were analyzed by drawing a region of interest around the entire stomata and  
656 thresholding to exclude pixels of background intensity values from each measurement. Ratios  
657 were calculated by dividing fluorescence intensity following excitation at 405 nm by  
658 fluorescence intensity collected after 488 nm excitation. All individual values obtained were  
659 normalized to the average of buffer control treated stomata or the 0-minute timepoint in the case  
660 of time courses. Ratiometric micrographs were generated using the Ratio Redox Analysis  
661 MatLab program package (Fricker, 2016).

## 662 **Stomatal Closure Assay**

663 ABA-induced stomatal closure assays were performed with plants 3 to 4 weeks after  
664 germination. Epidermal strips were prepared and fully covered in opening solution as described  
665 above. For inhibitor treatments, opening buffer was replaced with stomatal opening solution  
666 containing either 50  $\mu\text{M}$  rotenone for 1 hr, 500 nM mitoquinol mesylate (MitoQ) for 3 hrs, or 10  
667  $\mu\text{M}$  VAS2870 for 1 hr during the opening process. To induce stomatal closure, opening buffer

668 was replaced with equal volume of a similar solution with 20  $\mu$ M added to induce closure. For  
669 quantification of stomatal aperture, leaf peels were imaged on an ECHO Revolve microscope  
670 using transmitted light. Images were acquired using an Olympus UPlanSApochromat  
671 40x/0.95NA objective.

## 672 **Statistical Analysis**

673 The data for the subcellular localization of DCF and whole stomata roGFP2-Orp1 quantifications  
674 were analyzed via student t-tests using GraphPad Prism 9 comparing ABA to control in each  
675 respective cellular location. DCF fluorescence intensities for ABA signaling mutants and widths  
676 of stomatal apertures were analyzed by two-way ANOVA, while subcellular PO1 signal  
677 intensity, and roGFP2-Orp1 time course data were analyzed by one-way ANOVA using  
678 GraphPad Prism 9. This analysis evaluated differences within genotypes between different  
679 treatments and compared between genotypes under similar treatments for ABA signaling  
680 mutants, between control and multiple ABA treatments for PO1 fluorescence, and between  
681 timepoints for roGFP2-Orp1 and mt-roGFP2-Orp1. Tukey's multiple comparison tests were then  
682 utilized to resolve significant differences between treatments, genotypes, or timepoints.

## 683 **Accession Numbers**

684 Sequence data from this article can be found in the GenBank/EMBL data libraries under the  
685 accession numbers: *PYR1* (At4g17870), *PYL1* (At5g46790), *PYL4* (At2g38310), *PYL5*  
686 (At5g05440), *PYL8* (At5g53160), *ABO6* (At5g04895), *RBOHD* (At5g47910), *RBOHF*  
687 (At1g64060).

## 688 **Acknowledgments**

689 We would like to acknowledge the assistance of Dr Heather Brown Harding (Microscopy core  
690 facility) with imaging. We thank Dr. Leslie Poole for generous sharing of expertise and research  
691 material. We also thank Antipodean Pharmaceuticals, Inc for supplying mitoquinol mesylate  
692 (MitoQ). We greatly appreciate the generosity of Dr Andreas Meyer and Dr Jose Ugalde in  
693 sharing roGFP2-Orp1, plastid-roGFP2-Orp1, and mt-roGFP2-Orp1 seeds, as well as providing  
694 helpful feedback on an early draft of the manuscript. We also thank Dr Gad Miller for providing  
695 *rbohdf* seeds and Dr. Bonnie Bartel for the GFP-PTS1 transgenic line, and the ABRC for

696 distributing *pyl-11458* and *abo6* seeds. Lastly, we would like to thank members of the Muday lab  
697 for valuable input on the manuscript. This work was funded by NSF IOS-1558046 to G.K.M and  
698 a fellowship from the Center for Molecular Signaling and an NIH T32 GM127261 fellowship to  
699 A.E.P. The content is solely the responsibility of the authors and does not necessarily represent  
700 the official view of the National Institutes of Health.

701 **Author Contributions**

702 AEP designed experiments, performed research, analyzed data, and wrote the paper. GKM  
703 designed experiments, wrote, and edited the paper.

704

705 **Figure Legends**

706 **Figure 1.** ABA treatment increases DCF fluorescence in multiple subcellular locations within  
707 *Arabidopsis* guard cells. A) Confocal micrographs of DCF fluorescence of guard cells in leaves  
708 from Col-0 or a quintuple ABA receptor mutant, *pyl-11458*, treated with control buffer or 20  $\mu$ M  
709 ABA shown directly or after conversion to LUT. Subcellular compartments are indicated on each  
710 image (C: Chloroplast, N: Nucleus, M: Mitochondria, V: Vacuole). Scale bar: 5 $\mu$ m.  
711 Quantifications of DCF fluorescence in the B) mitochondria, C) chloroplasts, D) nucleus and E)  
712 cytosol with and without ABA treatment from three separate experiments (chloroplast n>100,  
713 nucleus n>48, cytosol n>48 and mitochondria n>56). All individual values were normalized to  
714 the average of the control treatment for Col-0 in each subcellular location and are displayed on  
715 the graph as blue dots with the median shown in red and lower and upper quartiles indicated in  
716 black. All p-values were calculated by two-way ANOVA followed by a Tukey's post-hoc test  
717 from at least three separate experiments.

718 **Figure 2.** ABA increases fluorescence of Peroxy Orange 1 (PO1), a hydrogen peroxide selective  
719 dye. A) Confocal micrographs of PO1 fluorescence or PO1 signal converted to Lookup Tables  
720 (LUT) after treatment with 0, 20, or 100  $\mu$ M ABA. Maximum intensity projections of full z-  
721 stacks are shown. Scale bar: 5 $\mu$ m. Quantifications of PO1 fluorescence in B) mitochondria and  
722 C) chloroplasts. All individual values were normalized to the average of the control treatment for  
723 each subcellular location and are displayed on the graph as blue dots with the median shown in  
724 red and lower and upper quartiles indicated in black. All p-values were calculated by one-way  
725 ANOVA followed by a Tukey's post-hoc test from at least three separate experiments  
726 (mitochondria n>148 and chloroplast n>140).

727 **Figure 3.** ABA treatment results in increased ROS accumulation in cytosolic puncta that  
728 colocalize with mitochondria. A) Confocal micrographs of PO1 fluorescence (orange),  
729 chlorophyll autofluorescence (red), GFP-PTS1 (green), and a merged image. Maximum intensity  
730 projection of full z-stack is shown. B) Regions of interest used to generate weighted  
731 colocalization coefficient are circled in white, highlighting the absence of PO1 fluorescence  
732 colocalizing with GFP-PTS1 fluorescence. C) Colocalization graph generated with the ZEN  
733 Black colocalization module from regions of interest highlighting PO1-labeled cytosolic puncta.  
734 Numbers on scatterplot represent data points that either fall below the determined intensity cutoff

735 for PO1 (1) or GFP-PTS1 (2), or data points that are above thresholding limits for both  
736 fluorescent reporters (3). D) Confocal micrographs of DCF fluorescence (green), chlorophyll  
737 autofluorescence (red), Mitotracker (magenta), and a merged image showing DCF colocalized  
738 with Mitotracker (white). E) Regions of interest used to generate weighted colocalization  
739 coefficient are circled in white, showing DCF fluorescence colocalizing with Mitotracker  
740 fluorescence. F) Colocalization graph generated with the ZEN Black colocalization module from  
741 regions of interest highlighting DCF-labeled cytosolic puncta. Numbers on scatterplot represent  
742 data points that either fall below the determined intensity cutoff for Mitotracker (1) or DCF (2),  
743 or data points that are above thresholding limits for both fluorescent reporters (3). Scale bars:  
744 5 $\mu$ m.

745 **Figure 4.** roGFP2-Orp1 detects ABA-increased H<sub>2</sub>O<sub>2</sub> within the guard cell cytosol and nuclei.  
746 A) Confocal micrographs of Arabidopsis guard cells expressing roGFP2-Orp1 treated with 20  
747  $\mu$ M ABA for 45 min after excitation with either 405 or 488 nm laser line are shown along with  
748 ratiometric images that display fluorescence ratios calculated from those images. B)  
749 Quantification of intracellular roGFP2-Orp1 ratios following 20  $\mu$ M ABA or control treatment.  
750 Ratios are the fluorescence intensity collected after excitation at 405 nm divided by the intensity  
751 after 488 nm excitation. All individual values were normalized to the average of the control  
752 treatment and are displayed on the graph as blue dots with the median shown in red and lower  
753 and upper quartiles indicated in black with data from three separate experiments (n=64-69)  
754 whole stomata for each treatment). P-values were calculated from student t-test. C) Confocal  
755 micrographs of Arabidopsis guard cells converted to ratiometric values from cells expressing  
756 roGFP2-Orp1 treated with 20  $\mu$ M ABA for 0, 15, 30, or 45 min. Minimum and maximum sensor  
757 oxidation are shown by treatment with 20 mM DTT or 10 mM H<sub>2</sub>O<sub>2</sub>, respectively. Ratios are  
758 calculated as above. Normalized ratios are then created relative to the average for the 0 min  
759 timepoint. D) Quantification of roGFP2-Orp1 ratio in the cytosol and E) nucleus following 20  
760  $\mu$ M ABA for 0, 15, 30, or 45 min. Data are reported from three separate experiments (n>131  
761 guard cells for each time point). Minimum and maximum sensor oxidation is represented on  
762 graphs by gray dashed lines. The significance of differences between indicated time points were  
763 determined by one-way ANOVA followed by a Tukey's multiple comparisons test and are  
764 shown on the graph. Scale bar: 5 $\mu$ m.

765 **Figure 5.** Mitochondrially targeted roGFP2-Orp1 reveals ABA-dependent H<sub>2</sub>O<sub>2</sub> increases. A)  
766 Confocal micrographs of Arabidopsis guard cells expressing mt-roGFP2-Orp1 treated with 20  
767 μM ABA or control buffer for 45 min. Ratiometric images display fluorescence ratios calculated  
768 from separate images taken using sequential excitation at 488 nm and 405 nm for each time  
769 point. Ratios are calculated by dividing fluorescence intensity collected at emission window 500-  
770 535 nm after excitation at 405 nm by the intensity collected in the same emission window after  
771 488 nm excitation. Scale bar: 5μm. B) Quantification of mt-roGFP2-Orp1 ratio in the entire  
772 guard cell following 20 μM ABA or buffer control for 45 min. All individual values were  
773 normalized to the average of the control treatment and are displayed on the graph as blue dots  
774 with the median shown in red and lower and upper quartiles indicated in black. Minimum and  
775 maximum sensor oxidation are shown by treatment with 20 mM DTT or 10 mM H<sub>2</sub>O<sub>2</sub>,  
776 respectively. Data are reported from three separate experiments (n>50 stomata). Minimum and  
777 maximum sensor oxidation, determined by treatment with DTT and H<sub>2</sub>O<sub>2</sub>, respectively, is  
778 represented on graphs by gray dashed lines. Listed p-values were determined by one-way  
779 ANOVA followed by Tukey's post hoc test. Scale bars: 5μm.

780 **Figure 6.** Perturbations in mitochondrial ROS influence the rate of ABA-induced stomatal  
781 closure. A) Confocal micrographs of DCF fluorescence following conversion to LUT for *abo6*  
782 guard cells treated with control buffer or 20 μM ABA for 45 min. Scale bar: 5μm. B) DCF  
783 fluorescence was quantified within mitochondria of Col-0 and *abo6* guard cells with and without  
784 ABA treatment from three separate experiments and is reported relative to untreated Col-0, with  
785 each bar represented by (n>75) guard cells. C) Stomatal apertures of leaves of Col-0 or *abo6*  
786 pretreated with either control buffer, 50 μM rotenone for 1 hr or 500 nM MitoQ for 3 hrs and  
787 then treated with 20 μM ABA for 45 min. Scale bar: 5μm. D) Quantification of mt-roGFP2-Orp1  
788 ratio of the entire guard cell following 20 μM ABA, buffer control, or pretreatment with either  
789 100 or 500 nM MitoQ for 3 hrs followed by ABA treatment for 45 min (n=65). E) Stomatal  
790 apertures of Col-0 and *abo6* leaves were quantified at 0, 15, 30, 45 min after ABA treatment  
791 (n>85 stomata/per reported value) in the presence and absence of MitoQ or rotenone, with the  
792 average and SEM graphed at each time point. All individual values in B) and D) were  
793 normalized to the average of the control treatment for Col-0 and are displayed on the graph as  
794 blue dots with the median shown in red and lower and upper quartiles indicated in black. The p-

795 values for each quantification were generated by two-way ANOVA of the entire time course for  
796 each genotype/treatment, followed by Tukey's post hoc test.

797

798 **Figure 7.** RBOH enzymes contribute to ABA-increased ROS accumulation in guard cell  
799 mitochondria. A) Confocal micrographs of DCF fluorescence or DCF images converted to LUT  
800 of Col-0 or *rbohdf* guard cells treated with buffer control or 20  $\mu$ M ABA as well as Col-0 pre-  
801 treated with 10  $\mu$ M VAS2870 followed by ABA treatment. Scale bar: 5 $\mu$ m. B) Violin plots show  
802 quantifications of mitochondrial DCF fluorescence following treatment with control buffer,  
803 ABA, or pre-treated with VAS2870 and then treated with ABA from three separate experiments  
804 ( $n > 85$ ). C) Quantification of mt-roGFP2-Orp1 ratio of the entire guard cell following 20  $\mu$ M  
805 ABA, buffer control, or pretreatment with 10  $\mu$ M VAS2870 followed by ABA treatment ( $n > 77$ ).  
806 All individual values were normalized to the average of the control treatment in Col-0 and are  
807 displayed on the graph as blue dots with the median shown in red and lower and upper quartiles  
808 indicated in black. P-values in black font represent the significance of differences between  
809 treatments in the same genotype spanning the compared treatments. P-values in blue font  
810 representing the significance of differences between *rbohdf* and Col-0 under the same treatment  
811 conditions. P-values are recorded according to two-way ANOVA followed by Tukey's post hoc  
812 test.



## 813 **References**

- 814 **Alonso JM, Stepanova AN, Leisse TJ, Kim CJ, Chen H, Shinn P, Stevenson DK,**  
815 **Zimmerman J, Barajas P, Cheuk R, Gadrinab C, Heller C, Jeske A, Koesema E, Meyers**  
816 **CC, Parker H, Prednis L, Ansari Y, Choy N, Deen H, Geralt M, Hazari N, Hom E,**  
817 **Karnes M, Mulholland C, Ndubaku R, Schmidt I, Guzman P, Aguilar-Henonin L,**  
818 **Schmid M, Weigel D, Carter DE, Marchand T, Risseuw E, Brogden D, Zeko A, Crosby**  
819 **WL, Berry CC, Ecker JR (2003) Genome-Wide Insertional Mutagenesis of *Arabidopsis***  
820 **thaliana**. *Science* **301**: 653-657
- 821 **An Y, Liu L, Chen L, Wang L (2016) ALA Inhibits ABA-induced Stomatal Closure via**  
822 **Reducing H<sub>2</sub>O<sub>2</sub> and Ca<sup>2+</sup> Levels in Guard Cells. *Frontiers in Plant Science* **7****
- 823 **Augsburger F, Filippova A, Rasti D, Seredenina T, Lam M, Maghzal G, Mahiout Z,**  
824 **Jansen-Dürr P, Knaus UG, Doroshov J, Stocker R, Krause KH, Jaquet V (2019)**  
825 **Pharmacological characterization of the seven human NOX isoforms and their inhibitors.**  
826 ***Redox Biol* **26**: 101272**
- 827 **Azoulay-Shemer T, Palomares A, Bagheri A, Israelsson-Nordstrom M, Engineer CB,**  
828 **Bargmann BO, Stephan AB, Schroeder JI (2015) Guard cell photosynthesis is critical for**  
829 **stomatal turgor production, yet does not directly mediate CO<sub>2</sub> - and ABA-induced stomatal**  
830 **closing. *Plant J* **83**: 567-581**
- 831 **Babbar R, Karpinska B, Grover A, Foyer CH (2021) Heat-Induced Oxidation of the Nuclei**  
832 **and Cytosol. *Frontiers in Plant Science* **11****
- 833 **Bienert GP, Moller AL, Kristiansen KA, Schulz A, Moller IM, Schjoerring JK, Jahn TP**  
834 **(2007) Specific aquaporins facilitate the diffusion of hydrogen peroxide across membranes. *J***  
835 ***Biol Chem* **282**: 1183-1192**
- 836 **Chapman JM, Muhlemann JK, Gayomba SR, Muday GK (2019) RBOH-Dependent ROS**  
837 **Synthesis and ROS Scavenging by Plant Specialized Metabolites To Modulate Plant**  
838 **Development and Stress Responses. *Chemical Research in Toxicology* **32**: 370-396**
- 839 **Demidchik V (2018) ROS-Activated Ion Channels in Plants: Biophysical Characteristics,**  
840 **Physiological Functions and Molecular Nature. *International journal of molecular sciences***  
841 ****19**: 1263**
- 842 **Dickinson BC, Huynh C, Chang CJ (2010) A palette of fluorescent probes with varying**  
843 **emission colors for imaging hydrogen peroxide signaling in living cells. *Journal of the***  
844 ***American Chemical Society* **132**: 5906-5915**
- 845 **Dikalov S (2011) Cross talk between mitochondria and NADPH oxidases. *Free Radic Biol Med***  
846 ****51**: 1289-1301**
- 847 **Drerup MM, Schlücking K, Hashimoto K, Manishankar P, Steinhorst L, Kuchitsu K,**  
848 **Kudla J (2013) The Calcineurin B-Like Calcium Sensors CBL1 and CBL9 Together with**  
849 **Their Interacting Protein Kinase CIPK26 Regulate the Arabidopsis NADPH Oxidase**  
850 **RBOHF. *Molecular Plant* **6**: 559-569**
- 851 **Fahad S, Bajwa AA, Nazir U, Anjum SA, Farooq A, Zohaib A, Sadia S, Nasim W, Adkins**  
852 **S, Saud S, Ihsan MZ, Alharby H, Wu C, Wang D, Huang J (2017) Crop Production under**  
853 **Drought and Heat Stress: Plant Responses and Management Options. *Frontiers in Plant***  
854 ***Science* **8****
- 855 **Fricker MD (2016) Quantitative Redox Imaging Software. *Antioxid Redox Signal* **24**: 752-762**
- 856 **Fukai T, Ushio-Fukai M (2011) Superoxide dismutases: role in redox signaling, vascular**  
857 **function, and diseases. *Antioxidants & redox signaling* **15**: 1583-1606**

- 858 **Gadjev I, Vanderauwera S, Gechev TS, Laloi C, Minkov IN, Shulaev V, Apel K, Inzé D,**  
859 **Mittler R, Van Breusegem F** (2006) Transcriptomic footprints disclose specificity of  
860 reactive oxygen species signaling in Arabidopsis. *Plant Physiol* **141**: 436-445
- 861 **Gayatri G, Agurla S, Kuchitsu K, Anil K, Podile AR, Raghavendra AS** (2017) Stomatal  
862 Closure and Rise in ROS/NO of Arabidopsis Guard Cells by Tobacco Microbial Elicitors:  
863 Cryptogein and Harpin. *Frontiers in Plant Science* **8**
- 864 **Geiger D, Scherzer S, Mumm P, Stange A, Marten I, Bauer H, Ache P, Matschi S, Liese A,**  
865 **Al-Rasheid KAS, Romeis T, Hedrich R** (2009) Activity of guard cell anion channel SLAC1  
866 is controlled by drought-stress signaling kinase-phosphatase pair. *Proceedings of the National*  
867 *Academy of Sciences of the United States of America* **106**: 21425-21430
- 868 **Gutscher M, Sobotta MC, Wabnitz GH, Ballikaya S, Meyer AJ, Samstag Y, Dick TP** (2009)  
869 Proximity-based protein thiol oxidation by H<sub>2</sub>O<sub>2</sub>-scavenging peroxidases. *The Journal of*  
870 *biological chemistry* **284**: 31532-31540
- 871 **Halliwell B, Whiteman M** (2004) Measuring reactive species and oxidative damage in vivo and  
872 in cell culture: how should you do it and what do the results mean? *Br J Pharmacol* **142**: 231-  
873 255
- 874 **He J, Duan Y, Hua D, Fan G, Wang L, Liu Y, Chen Z, Han L, Qu LJ, Gong Z** (2012)  
875 DEXH box RNA helicase-mediated mitochondrial reactive oxygen species production in  
876 Arabidopsis mediates crosstalk between abscisic acid and auxin signaling. *Plant Cell* **24**:  
877 1815-1833
- 878 **Hsu P-K, Dubeaux G, Takahashi Y, Schroeder JI** (2021) Signaling mechanisms in abscisic  
879 acid-mediated stomatal closure. *The Plant journal : for cell and molecular biology* **105**: 307-  
880 321
- 881 **Hsu P-K, Takahashi Y, Munemasa S, Merilo E, Laanemets K, Waadt R, Pater D, Kollist H,**  
882 **Schroeder JI** (2018) Abscisic acid-independent stomatal CO<sub>2</sub> signal  
883 transduction pathway and convergence of CO<sub>2</sub> and ABA signaling downstream  
884 of OST1 kinase. *Proceedings of the National Academy of Sciences* **115**: E9971-E9980
- 885 **Jezek M, Blatt MR** (2017) The Membrane Transport System of the Guard Cell and Its  
886 Integration for Stomatal Dynamics *Plant Physiology* **174**: 487-519
- 887 **Kalyanaraman B, Darley-USmar V, Davies KJA, Dennery PA, Forman HJ, Grisham MB,**  
888 **Mann GE, Moore K, Roberts LJ, Ischiropoulos H** (2012) Measuring reactive oxygen and  
889 nitrogen species with fluorescent probes: challenges and limitations. *Free Radical Biology*  
890 *and Medicine* **52**: 1-6
- 891 **Kelso GF, Porteous CM, Coulter CV, Hughes G, Porteous WK, Ledgerwood EC, Smith**  
892 **RAJ, Murphy MP** (2001) Selective Targeting of a Redox-active Ubiquinone to  
893 Mitochondria within Cells: ANTIOXIDANT AND ANTIAPOPTOTIC PROPERTIES \*.  
894 *Journal of Biological Chemistry* **276**: 4588-4596
- 895 **Klejchova M, Silva-Alvim FAL, Blatt MR, Alvim JC** (2021) Membrane voltage as a dynamic  
896 platform for spatiotemporal signaling, physiological, and developmental regulation. *Plant*  
897 *Physiology* **185**: 1523-1541
- 898 **Kwak JM, Mori IC, Pei ZM, Leonhardt N, Torres MA, Dangl JL, Bloom RE, Bodde S,**  
899 **Jones JD, Schroeder JI** (2003) NADPH oxidase AtrbohD and AtrbohF genes function in  
900 ROS-dependent ABA signaling in Arabidopsis. *Embo j* **22**: 2623-2633
- 901 **Lamaoui M, Jemo M, Datla R, Bekkaoui F** (2018) Heat and Drought Stresses in Crops and  
902 Approaches for Their Mitigation. *Frontiers in Chemistry* **6**

- 903 **Leshem Y, Levine A** (2013) Zooming into sub-organellar localization of reactive oxygen  
904 species in guard cell chloroplasts during abscisic acid and methyl jasmonate treatments. *Plant*  
905 *Signal Behav* **8**: doi: 10.4161/psb.25689
- 906 **Li N, Ragheb K, Lawler G, Sturgis J, Rajwa B, Melendez JA, Robinson JP** (2003)  
907 Mitochondrial Complex I Inhibitor Rotenone Induces Apoptosis through Enhancing  
908 Mitochondrial Reactive Oxygen Species Production\*. *Journal of Biological Chemistry* **278**:  
909 8516-8525
- 910 **Li Q, Wang Y-J, Liu C-K, Pei Z-M, Shi W-L** (2017) The crosstalk between ABA, nitric oxide,  
911 hydrogen peroxide, and calcium in stomatal closing of *Arabidopsis thaliana*. **72**: 1140
- 912 **Ma Y, Szostkiewicz I, Korte A, Moes D, Yang Y, Christmann A, Grill E** (2009) Regulators  
913 of PP2C phosphatase activity function as abscisic acid sensors. *Science* **324**: 1064-1068
- 914 **Martin RE, Postiglione AE, Muday GK** (2022) Reactive oxygen species function as signaling  
915 molecules in controlling plant development and hormonal responses. *Current Opinion in Plant*  
916 *Biology* **69**: 102293
- 917 **Miller G, Schlauch K, Tam R, Cortes D, Torres MA, Shulaev V, Dangl JL, Mittler R** (2009)  
918 The plant NADPH oxidase RBOHD mediates rapid systemic signaling in response to diverse  
919 stimuli. *Sci Signal* **2**: ra45
- 920 **Mohammed F, Gorla M, Bisoyi V, Tammineni P, Sepuri NBV** (2020) Rotenone-induced  
921 reactive oxygen species signal the recruitment of STAT3 to mitochondria. *FEBS Lett* **594**:  
922 1403-1412
- 923 **Muhammad Aslam M, Waseem M, Jakada BH, Okal EJ, Lei Z, Saqib HSA, Yuan W, Xu**  
924 **W, Zhang Q** (2022) Mechanisms of Abscisic Acid-Mediated Drought Stress Responses in  
925 Plants. *Int J Mol Sci* **23**
- 926 **Nietzel T, Elsässer M, Ruberti C, Steinbeck J, Ugalde JM, Fuchs P, Wagner S, Ostermann**  
927 **L, Moseler A, Lemke P, Fricker MD, Müller-Schüssele SJ, Moerschbacher BM, Costa**  
928 **A, Meyer AJ, Schwarzländer M** (2019) The fluorescent protein sensor roGFP2-Orp1  
929 monitors in vivo H<sub>2</sub>O<sub>2</sub> and thiol redox integration and elucidates intracellular H<sub>2</sub>O<sub>2</sub>  
930 dynamics during elicitor-induced oxidative burst in *Arabidopsis*. *New Phytologist* **221**: 1649-  
931 1664
- 932 **Nilson SE, Assmann SM** (2007) The control of transpiration. Insights from *Arabidopsis*. *Plant*  
933 *physiology* **143**: 19-27
- 934 **Nishimura N, Sarkeshik A, Nito K, Park S-Y, Wang A, Carvalho PC, Lee S, Caddell DF,**  
935 **Cutler SR, Chory J, Yates JR, Schroeder JI** (2010) PYR/PYL/RCAR family members are  
936 major in-vivo ABI1 protein phosphatase 2C-interacting proteins in *Arabidopsis*. *The Plant*  
937 *journal : for cell and molecular biology* **61**: 290-299
- 938 **Noctor G, Foyer CH** (2016) Intracellular Redox Compartmentation and ROS-Related  
939 Communication in Regulation and Signaling *Plant Physiology* **171**: 1581-1592
- 940 **Palmer G, Horgan DJ, Tisdale H, Singer TP, Beinert H** (1968) Studies on the respiratory  
941 chain-linked reduced nicotinamide adenine dinucleotide dehydrogenase. XIV. Location of the  
942 sites of inhibition of rotenone, barbiturates, and piericidin by means of electron paramagnetic  
943 resonance spectroscopy. *J Biol Chem* **243**: 844-847
- 944 **Park SY, Fung P, Nishimura N, Jensen DR, Fujii H, Zhao Y, Lumba S, Santiago J,**  
945 **Rodrigues A, Chow TF, Alfred SE, Bonetta D, Finkelstein R, Provart NJ, Desveaux D,**  
946 **Rodriguez PL, McCourt P, Zhu JK, Schroeder JI, Volkman BF, Cutler SR** (2009)  
947 Abscisic acid inhibits type 2C protein phosphatases via the PYR/PYL family of START  
948 proteins. *Science* **324**: 1068-1071

- 949 **Pei ZM, Murata Y, Benning G, Thomine S, Klusener B, Allen GJ, Grill E, Schroeder JI**  
950 (2000) Calcium channels activated by hydrogen peroxide mediate abscisic acid signalling in  
951 guard cells. *Nature* **406**: 731-734
- 952 **Postiglione AE, Muday GK** (2020) The Role of ROS Homeostasis in ABA-Induced Guard Cell  
953 Signaling. *Frontiers in Plant Science* **11**
- 954 **Qi J, Song C-P, Wang B, Zhou J, Kangasjärvi J, Zhu J-K, Gong Z** (2018) Reactive oxygen  
955 species signaling and stomatal movement in plant responses to drought stress and pathogen  
956 attack. *Journal of Integrative Plant Biology* **60**: 805-826
- 957 **Qu Y, Song P, Hu Y, Jin X, Jia Q, Zhang X, Chen L, Zhang Q** (2018) Regulation of stomatal  
958 movement by cortical microtubule organization in response to darkness and ABA signaling in  
959 *Arabidopsis*. *Plant Growth Regulation* **84**: 467-479
- 960 **Ramón NM, Bartel B** (2010) Interdependence of the peroxisome-targeting receptors in  
961 *Arabidopsis thaliana*: PEX7 facilitates PEX5 accumulation and import of PTS1 cargo into  
962 peroxisomes. *Molecular biology of the cell* **21**: 1263-1271
- 963 **Reis J, Massari M, Marchese S, Cecon M, Aalbers FS, Corana F, Valente S, Mai A,**  
964 **Magnani F, Mattevi A** (2020) A closer look into NADPH oxidase inhibitors: Validation and  
965 insight into their mechanism of action. *Redox Biology* **32**: 101466
- 966 **Rodrigues O, Reshetnyak G, Grondin A, Saijo Y, Leonhardt N, Maurel C, Verdoucq L**  
967 (2017) Aquaporins facilitate hydrogen peroxide entry into guard cells to mediate ABA- and  
968 pathogen-triggered stomatal closure. *Proceedings of the National Academy of Sciences* **114**:  
969 9200-9205
- 970 **Scuffi D, Nietzel T, Di Fino LM, Meyer AJ, Lamattina L, Schwarzländer M, Laxalt AM,**  
971 **García-Mata C** (2018) Hydrogen Sulfide Increases Production of NADPH Oxidase-  
972 Dependent Hydrogen Peroxide and Phospholipase D-Derived Phosphatidic Acid in Guard  
973 Cell Signaling. *Plant physiology* **176**: 2532-2542
- 974 **Shanmugasundaram K, Nayak BK, Friedrichs WE, Kaushik D, Rodriguez R, Block K**  
975 (2017) NOX4 functions as a mitochondrial energetic sensor coupling cancer metabolic  
976 reprogramming to drug resistance. *Nature Communications* **8**: 997
- 977 **Sirichandra C, Gu D, Hu HC, Davanture M, Lee S, Djaoui M, Valot B, Zivy M, Leung J,**  
978 **Merlot S, Kwak JM** (2009) Phosphorylation of the *Arabidopsis* AtbohF NADPH oxidase by  
979 OST1 protein kinase. *FEBS Lett* **583**: 2982-2986
- 980 **Suzuki N, Miller G, Morales J, Shulaev V, Torres MA, Mittler R** (2011) Respiratory burst  
981 oxidases: the engines of ROS signaling. *Current Opinion in Plant Biology* **14**: 691-699
- 982 **Swanson SJ, Choi WG, Chanoca A, Gilroy S** (2011) In vivo imaging of Ca<sup>2+</sup>, pH, and  
983 reactive oxygen species using fluorescent probes in plants. *Annu Rev Plant Biol* **62**: 273-297
- 984 **Takahashi Y, Zhang J, Hsu P-K, Ceciliato PHO, Zhang L, Dubeaux G, Munemasa S, Ge C,**  
985 **Zhao Y, Hauser F, Schroeder JI** (2020) MAP3Kinase-dependent SnRK2-kinase activation  
986 is required for abscisic acid signal transduction and rapid osmotic stress response. *Nature*  
987 *Communications* **11**: 12
- 988 **Tian S, Wang X, Li P, Wang H, Ji H, Xie J, Qiu Q, Shen D, Dong H** (2016) Plant Aquaporin  
989 AtPIP1;4 Links Apoplastic H<sub>2</sub>O<sub>2</sub> Induction to Disease Immunity Pathways. *Plant Physiol*  
990 **171**: 1635-1650
- 991 **Töldsepp K, Zhang J, Takahashi Y, Sindarovska Y, Hōrak H, Ceciliato PHO, Koolmeister**  
992 **K, Wang Y-S, Vaahtera L, Jakobson L, Yeh C-Y, Park J, Brosche M, Kollist H,**  
993 **Schroeder JI** (2018) Mitogen-activated protein kinases MPK4 and MPK12 are key  
994 components mediating CO<sub>2</sub>-induced stomatal movements. *The Plant Journal* **96**: 1018-1035



- 995 **Ugalde JM, Fuchs P, Nietzel T, Cutolo EA, Homagk M, Vothknecht UC, Holuigue L,**  
996 **Schwarzländer M, Müller-Schüssele SJ, Meyer AJ** (2021) Chloroplast-derived photo-  
997 oxidative stress causes changes in H<sub>2</sub>O<sub>2</sub> and EGSH in other subcellular compartments. *Plant*  
998 *Physiology* **186**: 125-141
- 999 **Ugalde JM, Schlößer M, Dongois A, Martinière A, Meyer AJ** (2021) The latest HyPe(r) in  
1000 plant H<sub>2</sub>O<sub>2</sub> biosensing. *Plant Physiology* **187**: 480-484
- 1001 **Vermot A, Petit-Härtlein I, Smith SME, Fieschi F** (2021) NADPH Oxidases (NOX): An  
1002 Overview from Discovery, Molecular Mechanisms to Physiology and Pathology.  
1003 *Antioxidants* (Basel, Switzerland) **10**: 890
- 1004 **Vishwakarma K, Upadhyay N, Kumar N, Yadav G, Singh J, Mishra RK, Kumar V, Verma**  
1005 **R, Upadhyay RG, Pandey M, Sharma S** (2017) Abscisic Acid Signaling and Abiotic Stress  
1006 Tolerance in Plants: A Review on Current Knowledge and Future Prospects. *Frontiers in Plant*  
1007 *Science* **8**
- 1008 **Wang WH, He EM, Chen J, Guo Y, Chen J, Liu X, Zheng HL** (2016) The reduced state of  
1009 the plastoquinone pool is required for chloroplast-mediated stomatal closure in response to  
1010 calcium stimulation. *Plant J* **86**: 132-144
- 1011 **Watkins JM, Chapman JM, Muday GK** (2017) Abscisic Acid-Induced Reactive Oxygen  
1012 Species Are Modulated by Flavonols to Control Stomata Aperture. *Plant Physiology* **175**:  
1013 1807-1825
- 1014 **Watkins JM, Hechler PJ, Muday GK** (2014) Ethylene-Induced Flavonol Accumulation in  
1015 Guard Cells Suppresses Reactive Oxygen Species and Moderates Stomatal Aperture. *Plant*  
1016 *Physiology* **164**: 1707-1717
- 1017 **Winterbourn CC** (2014) The challenges of using fluorescent probes to detect and quantify  
1018 specific reactive oxygen species in living cells. *Biochim Biophys Acta* **1840**: 730-738
- 1019 **Wu X, Qiao Z, Liu H, Acharya BR, Li C, Zhang W** (2017) CML20, an Arabidopsis  
1020 Calmodulin-like Protein, Negatively Regulates Guard Cell ABA Signaling and Drought  
1021 Stress Tolerance. *Frontiers in plant science* **8**: 824-824
- 1022 **Xu Z, Jiang Y, Jia B, Zhou G** (2016) Elevated-CO<sub>2</sub> Response of Stomata and Its Dependence  
1023 on Environmental Factors. *Frontiers in Plant Science* **7**
- 1024 **Yang L, Zhang J, He J, Qin Y, Hua D, Duan Y, Chen Z, Gong Z** (2014) ABA-mediated ROS  
1025 in mitochondria regulate root meristem activity by controlling PLETHORA expression in  
1026 Arabidopsis. *PLoS genetics* **10**: e1004791-e1004791
- 1027 **Yun B-W, Feechan A, Yin M, Saidi NBB, Le Bihan T, Yu M, Moore JW, Kang J-G, Kwon**  
1028 **E, Spoel SH, Pallas JA, Loake GJ** (2011) S-nitrosylation of NADPH oxidase regulates cell  
1029 death in plant immunity. *Nature* **478**: 264-268
- 1030 **Zhang L, Takahashi Y, Hsu P-K, Kollist H, Merilo E, Krysan PJ, Schroeder JI** (2020)  
1031 FRET kinase sensor development reveals SnRK2/OST1 activation by ABA but not by MeJA  
1032 and high CO<sub>2</sub> during stomatal closure. *eLife* **9**: e56351
- 1033 **Zhang X, Zhang L, Dong F, Gao J, Galbraith DW, Song CP** (2001) Hydrogen peroxide is  
1034 involved in abscisic acid-induced stomatal closure in *Vicia faba*. *Plant Physiol* **126**: 1438-  
1035 1448
- 1036 **Zhou Q, Liu C, Liu W, Zhang H, Zhang R, Liu J, Zhang J, Xu C, Liu L, Huang S, Chen L**  
1037 (2014) Rotenone Induction of Hydrogen Peroxide Inhibits mTOR-mediated S6K1 and 4E-  
1038 BP1/eIF4E Pathways, Leading to Neuronal Apoptosis. *Toxicological Sciences* **143**: 81-96

1039

1040

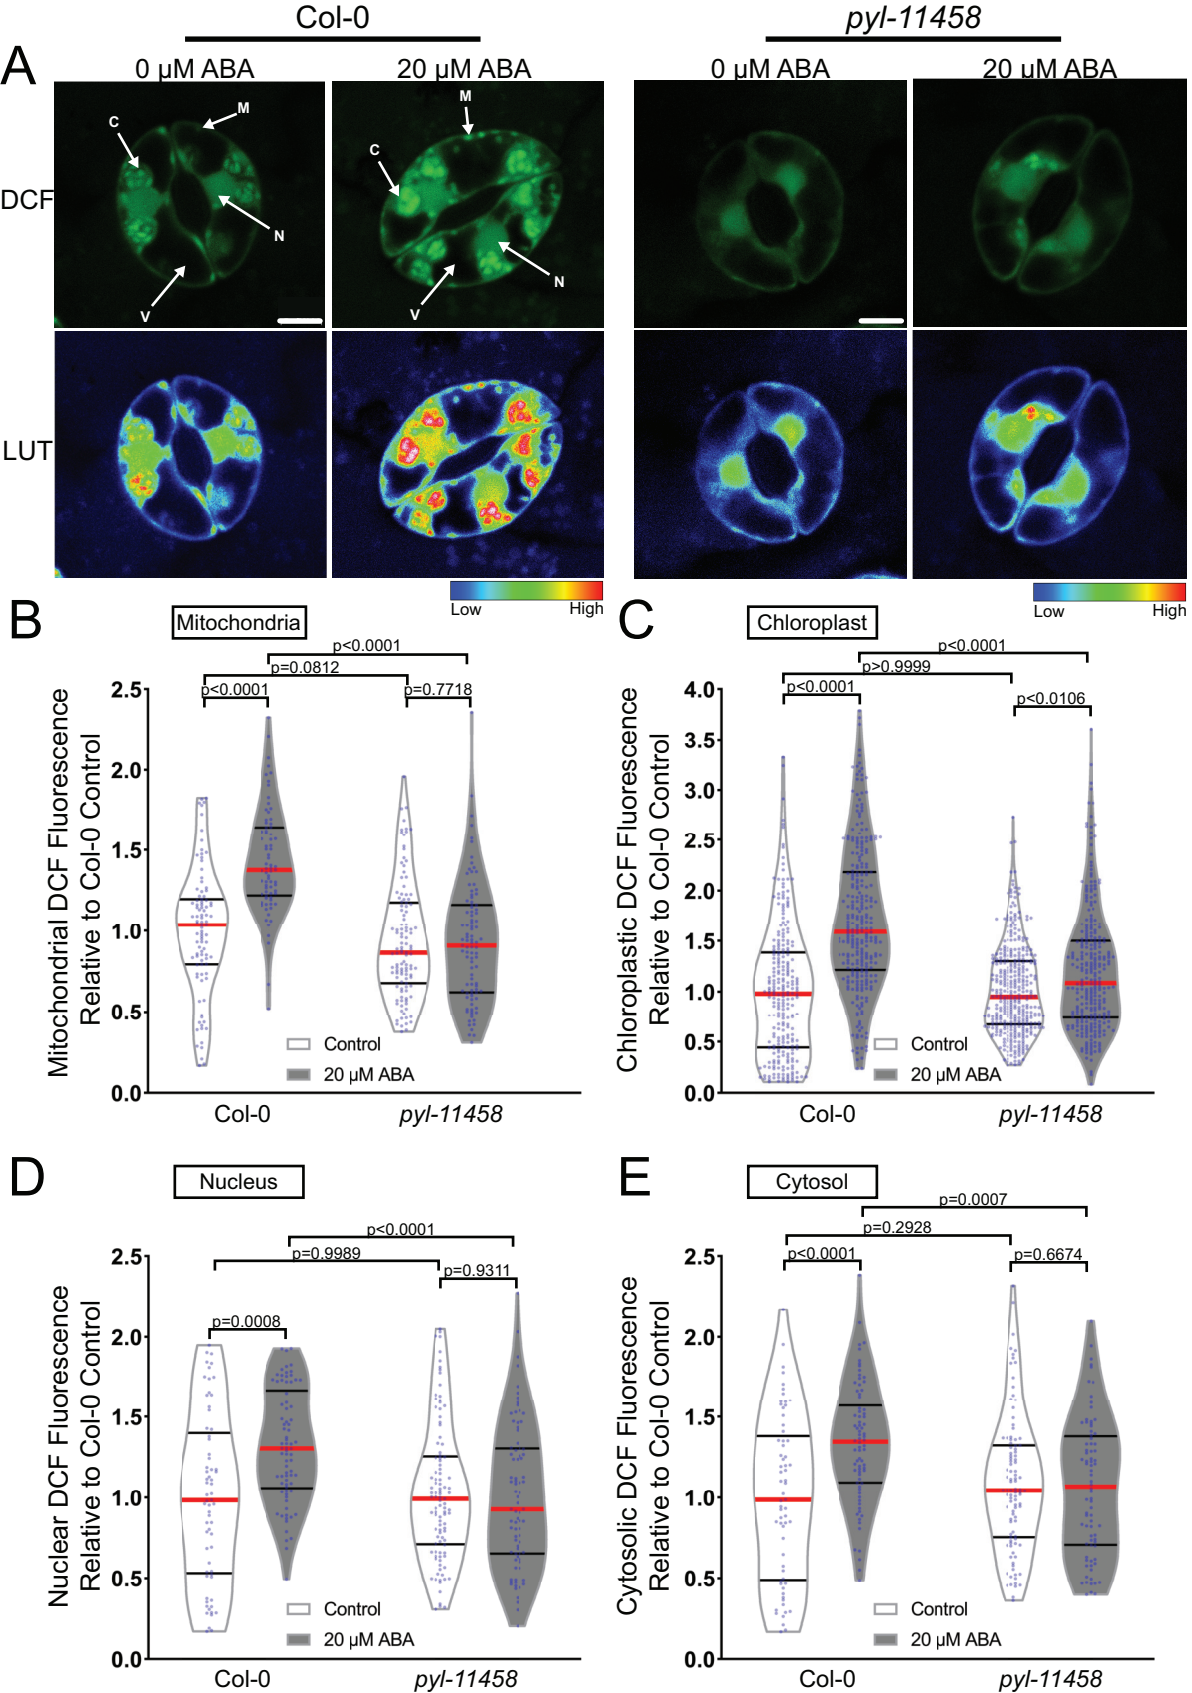

**Figure 1.** ABA treatment increases DCF fluorescence in multiple subcellular locations within Arabidopsis guard cells. A) Confocal micrographs of DCF fluorescence of guard cells in leaves from Col-0 or a quintuple ABA receptor mutant, *pyl-11458*, treated with control buffer or 20  $\mu$ M ABA shown directly or after conversion to LUT. Subcellular compartments are indicated on each image (C: Chloroplast, N: Nucleus, M: Mitochondria, V: Vacuole). Scale bar: 5  $\mu$ m. Quantifications of DCF fluorescence in the B) mitochondria, C) chloroplasts, D) nucleus and E) cytosol with and without ABA treatment from three separate experiments (chloroplast  $n > 100$ , nucleus  $n > 48$ , cytosol  $n > 48$  and mitochondria  $n > 56$ ). All individual values were normalized to the average of the control treatment for Col-0 in each subcellular location and are displayed on the graph as blue dots with the median shown in red and lower and upper quartiles indicated in black. All p-values were calculated by two-way ANOVA followed by a Tukey's post-hoc test from at least three separate experiments.

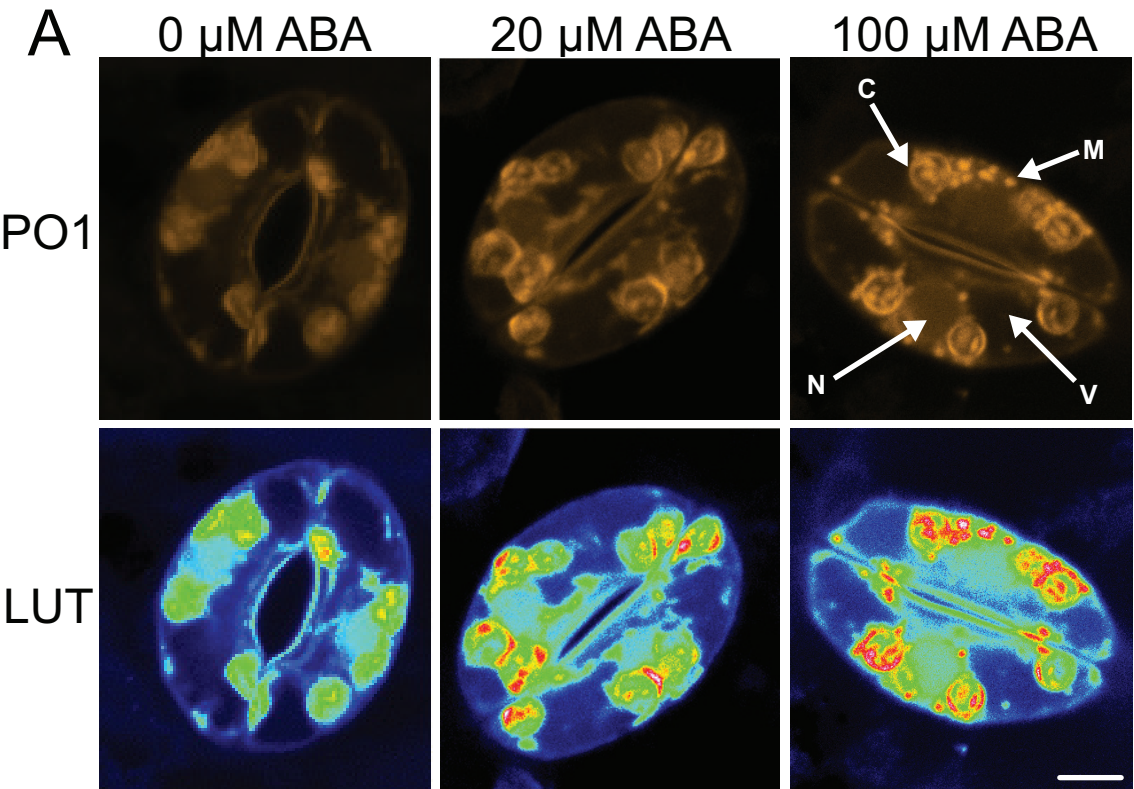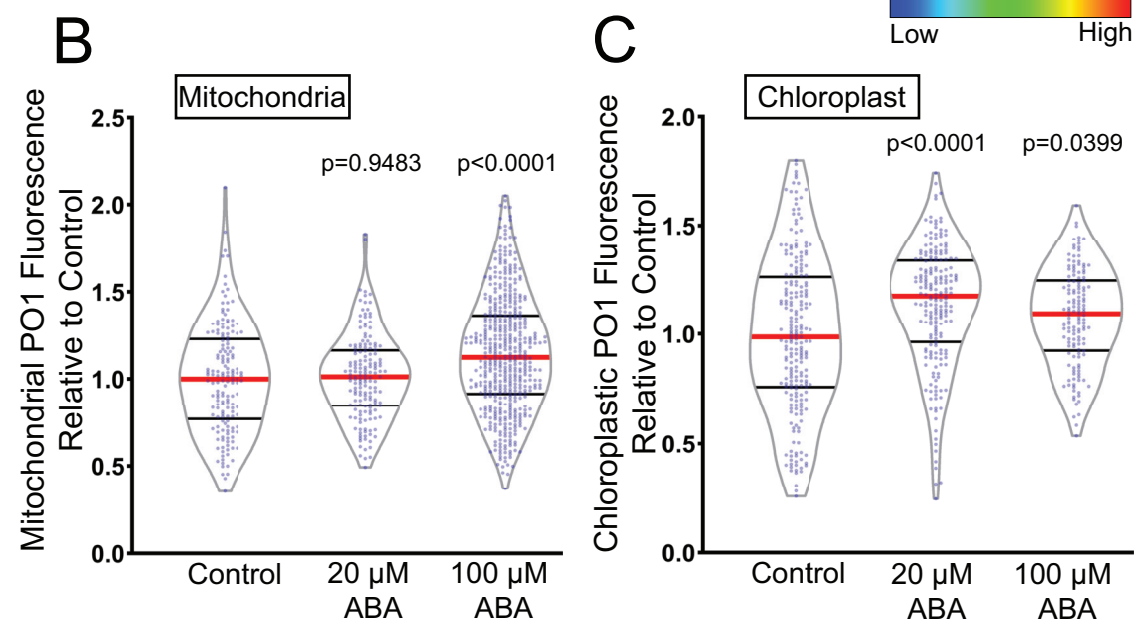

**Figure 2.** ABA increases fluorescence of Peroxy Orange 1 (PO1), a hydrogen peroxide selective dye. A) Confocal micrographs of PO1 fluorescence or PO1 signal converted to Lookup Tables (LUT) after treatment with 0, 20, or 100  $\mu\text{M}$  ABA. Maximum intensity projections of full z-stacks are shown. Scale bar: 5 $\mu\text{m}$ . Quantifications of PO1 fluorescence in the B) mitochondria and C) chloroplasts. All individual values were normalized to the average of the control treatment for each subcellular location and are displayed on the graph as blue dots with the median shown in red and lower and upper quartiles indicated in black. All p-values were calculated by one-way ANOVA followed by a Tukey's post-hoc test from at least three separate experiments (mitochondria  $n>148$  and chloroplast  $n>140$ ).



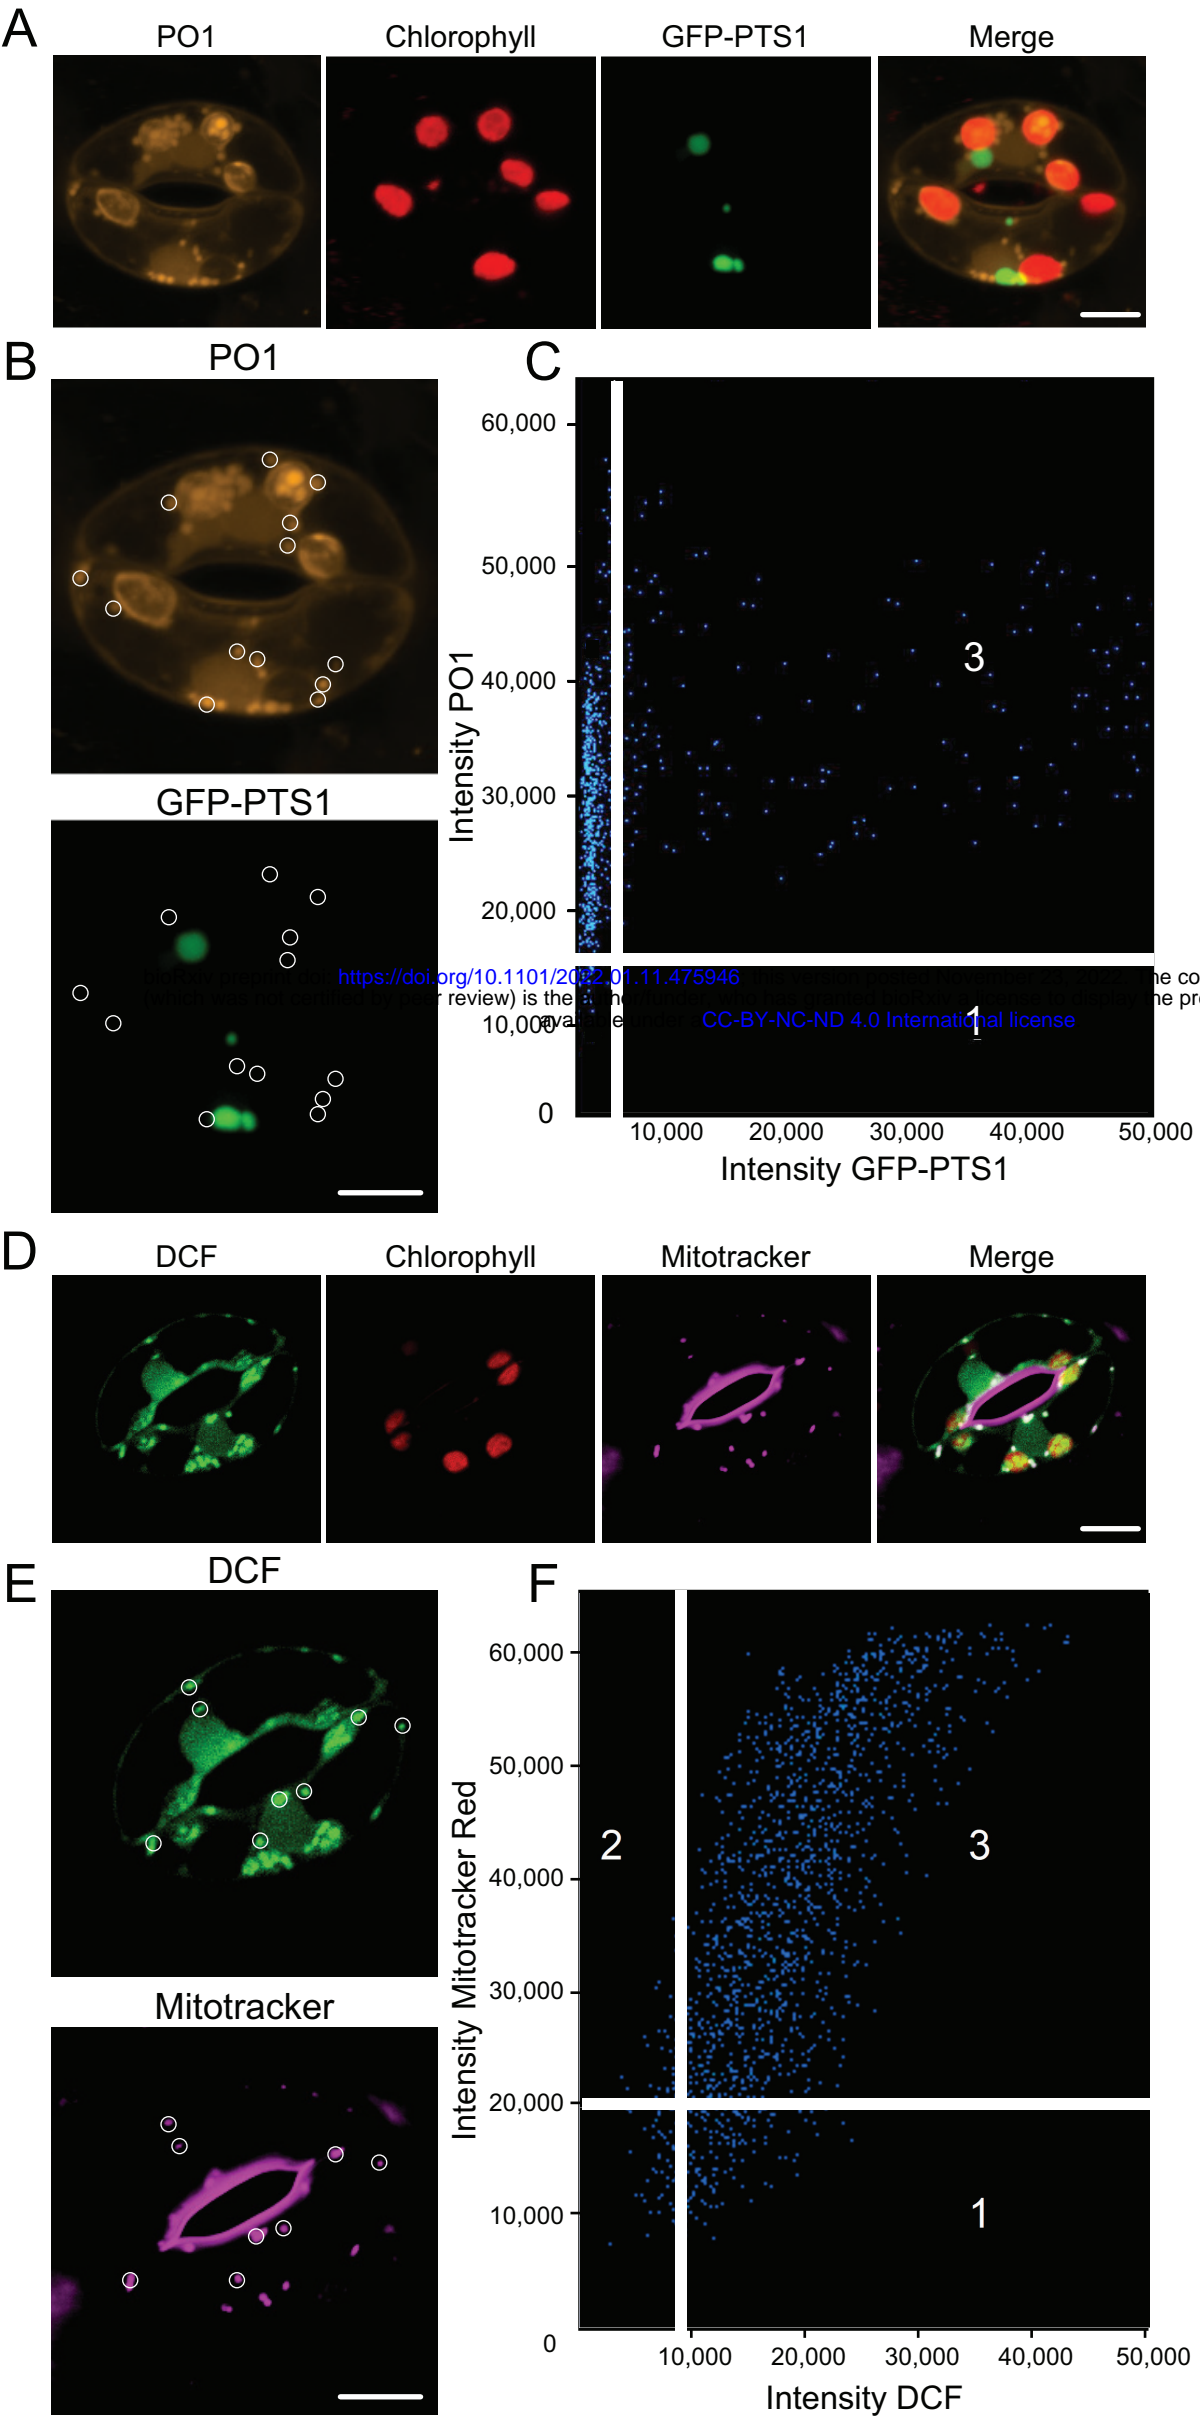

**Figure 3.** ABA treatment results in increased ROS accumulation in cytosolic puncta that colocalize with mitochondria. A) Confocal micrographs of PO1 fluorescence (orange), chlorophyll autofluorescence (red), GFP-PTS1 (green), and a merged image. Maximum intensity projection of full z-stack is shown. B) Regions of interest used to generate weighted colocalization coefficient are circled in white, highlighting the absence of PO1 fluorescence colocalizing with GFP-PTS1 fluorescence. C) Colocalization graph generated with the ZEN Black colocalization module from regions of interest highlighting PO1-labeled cytosolic puncta. Numbers on scatterplot represent data points that either fall below the determined intensity cutoff for PO1 (1) or GFP-PTS1 (2), or data points that are above thresholding limits for both fluorescent reporters (3). D) Confocal micrographs of DCF fluorescence (green), chlorophyll autofluorescence (red), Mitotracker (magenta), and a merged image showing DCF colocalized with Mitotracker (white). E) Regions of interest used to generate weighted colocalization coefficient are circled in white, showing DCF fluorescence colocalizing with Mitotracker fluorescence. F) Colocalization graph generated with the ZEN Black colocalization module from regions of interest highlighting DCF-labeled cytosolic puncta. Numbers on scatterplot represent data points that either fall below the determined intensity cutoff for Mitotracker (1) or DCF (2), or data points that are above thresholding limits for both fluorescent reporters (3). Scale bars: 5 $\mu$ m.

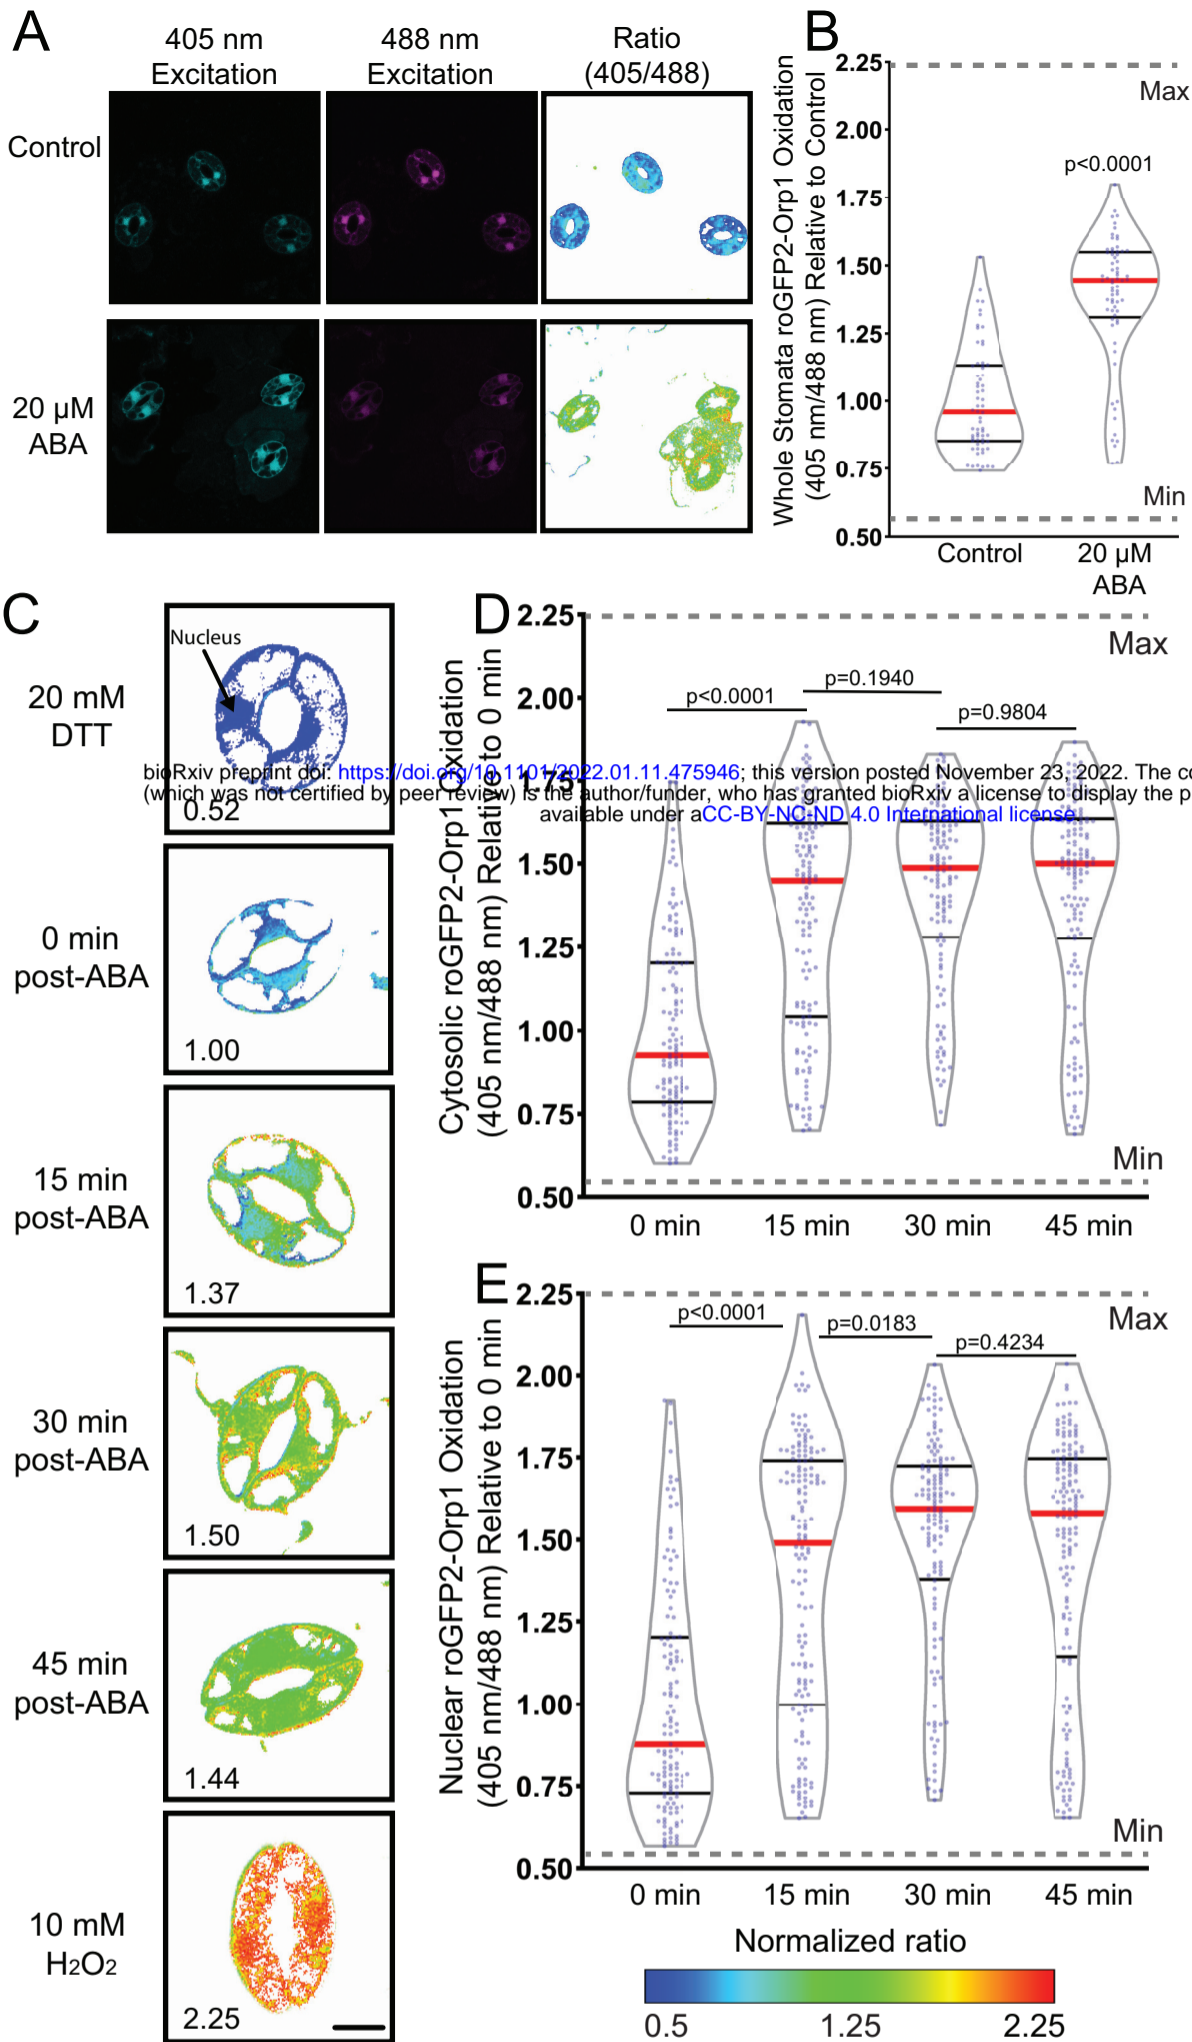

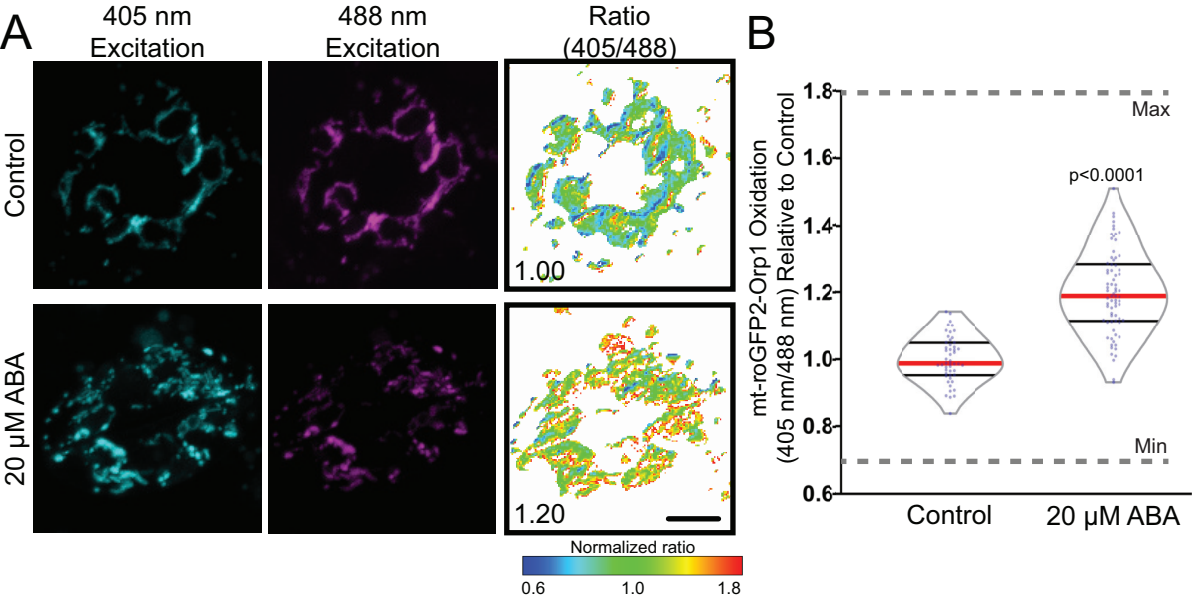

**Figure 5.** Mitochondrially targeted roGFP2-Orp1 reveals ABA-dependent  $\text{H}_2\text{O}_2$  increases. A) Confocal micrographs of Arabidopsis guard cells expressing mt-roGFP2-Orp1 treated with 20  $\mu\text{M}$  ABA or control buffer for 45 min. Ratiometric images display fluorescence ratios calculated from separate images taken using sequential excitation at 488 nm and 405 nm for each time point. Ratios are calculated by dividing fluorescence intensity collected at emission window 500-535 nm after excitation at 405 nm by the intensity collected in the same emission window after 488 nm excitation. Scale bar: 5  $\mu\text{m}$ . B) Quantification of mt-roGFP2-Orp1 ratio in the entire guard cell following 20  $\mu\text{M}$  ABA or buffer control for 45 min. All individual values were normalized to the average of the control treatment and are displayed on the graph as blue dots with the median shown in red and lower and upper quartiles indicated in black. Minimum and maximum sensor oxidation are shown by treatment with 20 mM DTT or 10 mM  $\text{H}_2\text{O}_2$ , respectively. Data are reported from three separate experiments ( $n > 50$  stomata). Minimum and maximum sensor oxidation, determined by treatment with DTT and  $\text{H}_2\text{O}_2$ , respectively, is represented on graphs by gray dashed lines. Listed p-values were determined by one-way ANOVA followed by Tukey's post hoc test. Scale bars: 5  $\mu\text{m}$ .



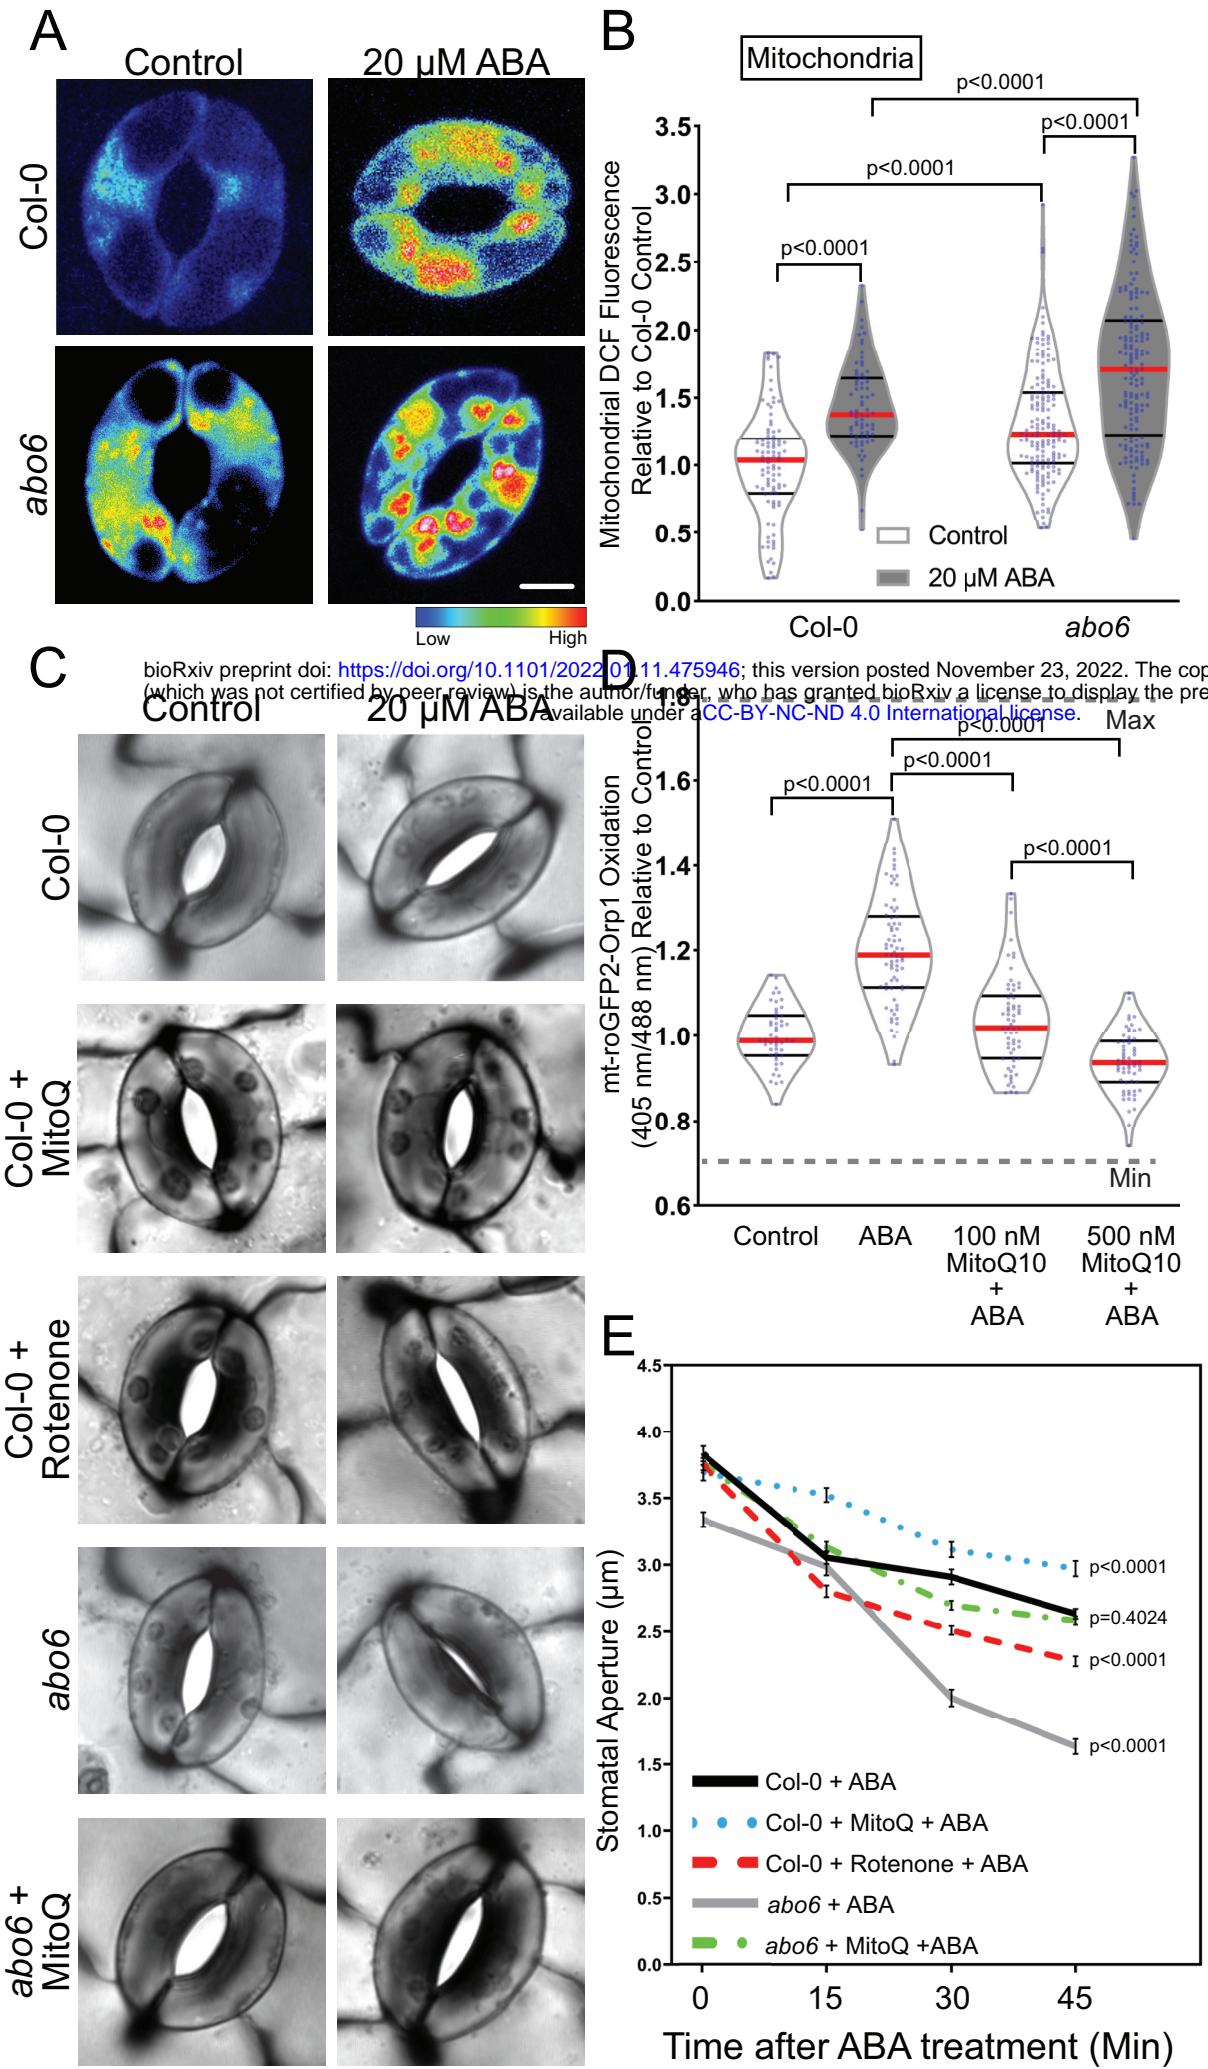

bioRxiv preprint doi: <https://doi.org/10.1101/2022.11.475946>; this version posted November 23, 2022. The copyright holder for this preprint (which was not certified by peer review) is the author/funder, who has granted bioRxiv a license to display the preprint in perpetuity. It is made available under aCC-BY-NC-ND 4.0 International license.

**Figure 6.** Perturbations in mitochondrial ROS influence the rate of ABA-induced stomatal closure. A) Confocal micrographs of DCF fluorescence following conversion to LUT for *abo6* guard cells treated with control buffer or 20  $\mu$ M ABA for 45 min. Scale bar: 5 $\mu$ m. B) DCF fluorescence was quantified within mitochondria of Col-0 and *abo6* guard cells with and without ABA treatment from three separate experiments and is reported relative to untreated Col-0, with each bar represented by (>75) guard cells. C) Stomatal apertures of leaves of Col-0 or *abo6* pretreated with either control buffer, 50  $\mu$ M rotenone for 1 hr or 500 nM MitoQ for 3 hrs and then treated with 20  $\mu$ M ABA for 45 min. Scale bar: 5 $\mu$ m. D) Quantification of mt-roGFP2-Orp1 ratio of the entire guard cell following 20  $\mu$ M ABA, buffer control, or pretreatment with either 100 or 500 nM MitoQ for 3 hrs followed by ABA treatment for 45 min (n=65). E) Stomatal apertures of Col-0 and *abo6* leaves were quantified at 0, 15, 30, 45 min after ABA treatment (>85 stomata/per reported value) in the presence and absence of MitoQ or rotenone, with the average and SEM graphed at each time point. All individual values in B) and D) were normalized to the average of the control treatment for Col-0 and are displayed on the graph as blue dots with the median shown in red and lower and upper quartiles indicated in black. The p-values for each quantification were generated by two-way ANOVA of the entire time course for each genotype/treatment, followed by Tukey's post hoc test.

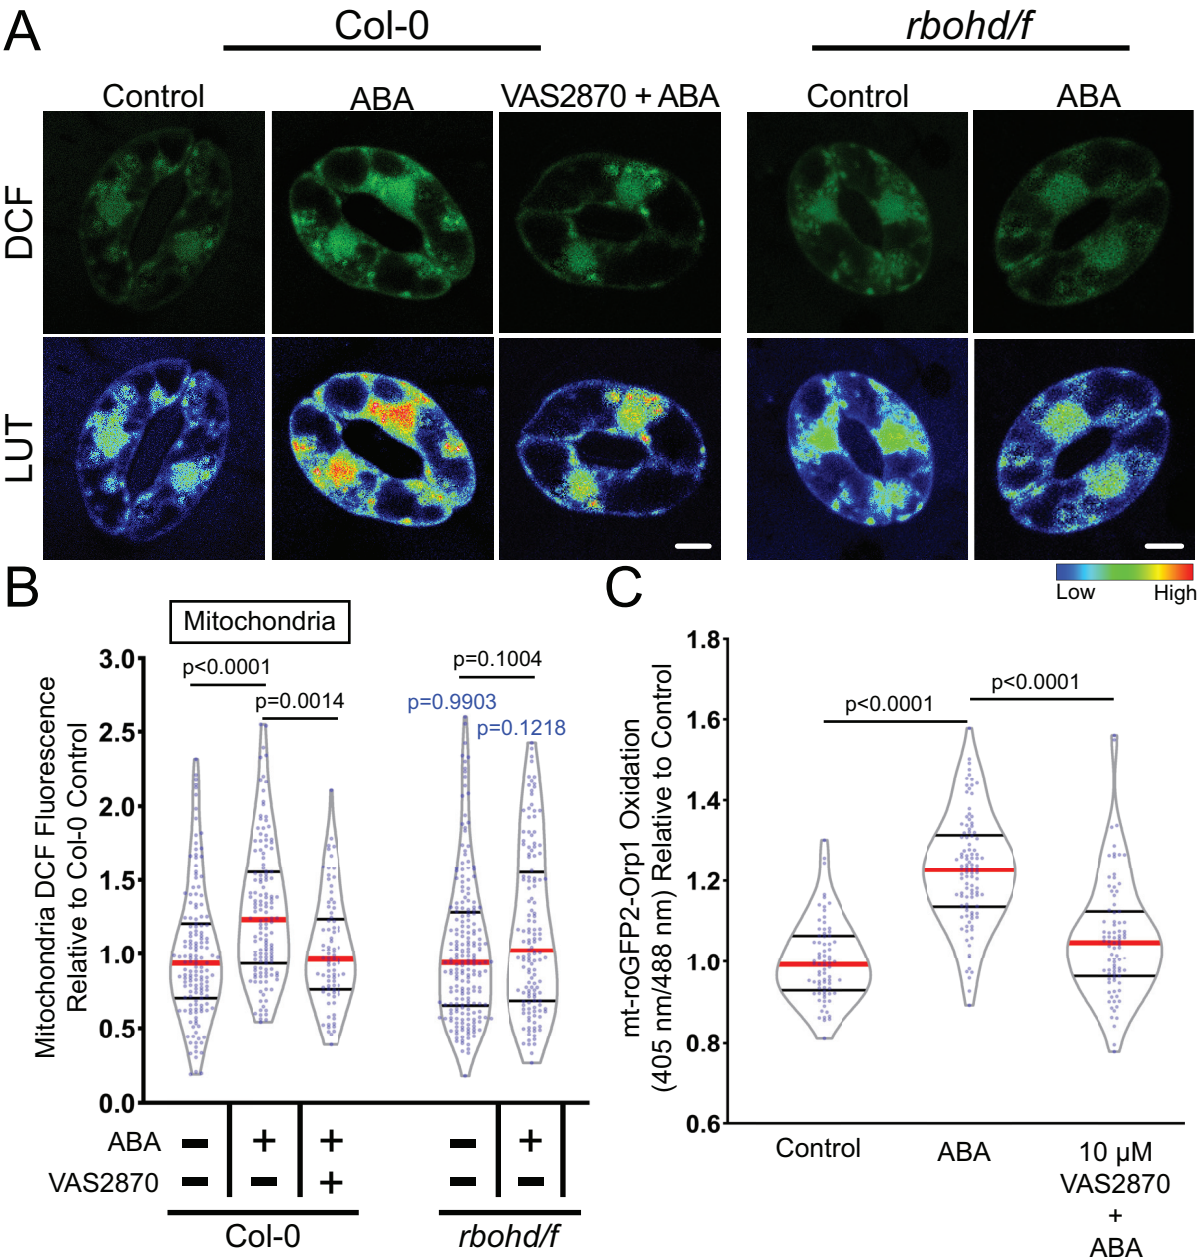

**Figure 7.** RBOH enzymes contribute to ABA-increased ROS accumulation in guard cell mitochondria. A) Confocal micrographs of DCF fluorescence or DCF images converted to LUT of Col-0 or *rbohd/f* guard cells treated with buffer control or 20  $\mu$ M ABA as well as Col-0 pre-treated with 10  $\mu$ M VAS2870 followed by ABA treatment. Scale bar: 5 $\mu$ m. B) Violin plots show quantifications of mitochondrial DCF fluorescence following treatment with control buffer, ABA, or pre-treated with VAS2870 and then treated with ABA from three separate experiments ( $n > 85$ ). C) Quantification of mt-roGFP2-Orp1 ratio of the entire guard cell following 20  $\mu$ M ABA, buffer control, or pretreatment with 10  $\mu$ M VAS2870 followed by ABA treatment ( $n > 77$ ). All individual values were normalized to the average of the control treatment in Col-0 and are displayed on the graph as blue dots with the median shown in red and lower and upper quartiles indicated in black. P-values in black font represent the significance of differences between treatments in the same genotype spanning the compared treatments. P-values in blue font representing the significance of differences between *rbohd/f* and Col-0 under the same treatment conditions. P-values are recorded according to two-way ANOVA followed by Tukey's post hoc test.



## Parsed Citations

Alonso JM, Stepanova AN, Leisse TJ, Kim CJ, Chen H, Shinn P, Stevenson DK, Zimmerman J, Barajas P, Cheuk R, Gadrinab C, Heller C, Jeske A, Koesema E, Meyers CC, Parker H, Prednis L, Ansari Y, Choy N, Deen H, Geralt M, Hazari N, Hom E, Karnes M, Mulholland C, Ndubaku R, Schmidt I, Guzman P, Aguilar-Henonin L, Schmid M, Weigel D, Carter DE, Marchand T, Risseuw E, Brogden D, Zeko A, Crosby WL, Berry CC, Ecker JR (2003) Genome-Wide Insertional Mutagenesis of *Arabidopsis thaliana*. *Science* 301: 653-657

Google Scholar: [Author Only](#) [Title Only](#) [Author and Title](#)

An Y, Liu L, Chen L, Wang L (2016) ALA Inhibits ABA-induced Stomatal Closure via Reducing H<sub>2</sub>O<sub>2</sub> and Ca<sup>2+</sup> Levels in Guard Cells. *Frontiers in Plant Science* 7

Google Scholar: [Author Only](#) [Title Only](#) [Author and Title](#)

Augsburger F, Filippova A, Rasti D, Seredenina T, Lam M, Maghzal G, Mahiout Z, Jansen-Dürr P, Knaus UG, Doroshov J, Stocker R, Krause KH, Jaquet V (2019) Pharmacological characterization of the seven human NOX isoforms and their inhibitors. *Redox Biol* 26: 101272

Google Scholar: [Author Only](#) [Title Only](#) [Author and Title](#)

Azoulay-Shemer T, Palomares A, Bagheri A, Israelsson-Nordstrom M, Engineer CB, Bargmann BO, Stephan AB, Schroeder JI (2015) Guard cell photosynthesis is critical for stomatal turgor production, yet does not directly mediate CO<sub>2</sub> - and ABA-induced stomatal closing. *Plant J* 83: 567-581

Google Scholar: [Author Only](#) [Title Only](#) [Author and Title](#)

Babbar R, Karpinska B, Grover A, Foyer CH (2021) Heat-Induced Oxidation of the Nuclei and Cytosol. *Frontiers in Plant Science* 11

Google Scholar: [Author Only](#) [Title Only](#) [Author and Title](#)

Bienert GP, Moller AL, Kristiansen KA, Schulz A, Moller IM, Schjoerring JK, Jahn TP (2007) Specific aquaporins facilitate the diffusion of hydrogen peroxide across membranes. *J Biol Chem* 282: 1183-1192

Google Scholar: [Author Only](#) [Title Only](#) [Author and Title](#)

Chapman JM, Muhlemann JK, Gayomba SR, Muday GK (2019) RBOH-Dependent ROS Synthesis and ROS Scavenging by Plant Specialized Metabolites To Modulate Plant Development and Stress Responses. *Chemical Research in Toxicology* 32: 370-396

Google Scholar: [Author Only](#) [Title Only](#) [Author and Title](#)

Demidchik V (2018) ROS-Activated Ion Channels in Plants: Biophysical Characteristics, Physiological Functions and Molecular Nature. *International journal of molecular sciences* 19: 1263

Google Scholar: [Author Only](#) [Title Only](#) [Author and Title](#)

Dickinson BC, Huynh C, Chang CJ (2010) A palette of fluorescent probes with varying emission colors for imaging hydrogen peroxide signaling in living cells. *Journal of the American Chemical Society* 132: 5906-5915

Google Scholar: [Author Only](#) [Title Only](#) [Author and Title](#)

Dikalov S (2011) Cross talk between mitochondria and NADPH oxidases. *Free Radic Biol Med* 51: 1289-1301

Google Scholar: [Author Only](#) [Title Only](#) [Author and Title](#)

Drerup MM, Schlücking K, Hashimoto K, Manishankar P, Steinhorst L, Kuchitsu K, Kudla J (2013) The Calcineurin B-Like Calcium Sensors CBL1 and CBL9 Together with Their Interacting Protein Kinase CIPK26 Regulate the Arabidopsis NADPH Oxidase RBOHF. *Molecular Plant* 6: 559-569

Google Scholar: [Author Only](#) [Title Only](#) [Author and Title](#)

Fahad S, Bajwa AA, Nazir U, Anjum SA, Farooq A, Zohaib A, Sadia S, Nasim W, Adkins S, Saud S, Ihsan MZ, Alharby H, Wu C, Wang D, Huang J (2017) Crop Production under Drought and Heat Stress: Plant Responses and Management Options. *Frontiers in Plant Science* 8

Google Scholar: [Author Only](#) [Title Only](#) [Author and Title](#)

Fricker MD (2016) Quantitative Redox Imaging Software. *Antioxid Redox Signal* 24: 752-762

Google Scholar: [Author Only](#) [Title Only](#) [Author and Title](#)

Fukai T, Ushio-Fukai M (2011) Superoxide dismutases: role in redox signaling, vascular function, and diseases. *Antioxidants & redox signaling* 15: 1583-1606

Google Scholar: [Author Only](#) [Title Only](#) [Author and Title](#)

Gadjev I, Vanderauwera S, Gechev TS, Laloi C, Minkov IN, Shulaev V, Apel K, Inzé D, Mittler R, Van Breusegem F (2006) Transcriptomic footprints disclose specificity of reactive oxygen species signaling in Arabidopsis. *Plant Physiol* 141: 436-445

Google Scholar: [Author Only](#) [Title Only](#) [Author and Title](#)

Gayatri G, Agurla S, Kuchitsu K, Anil K, Podile AR, Raghavendra AS (2017) Stomatal Closure and Rise in ROS/NO of Arabidopsis Guard Cells by Tobacco Microbial Elicitors: Cryptogein and Harpin. *Frontiers in Plant Science* 8

Google Scholar: [Author Only](#) [Title Only](#) [Author and Title](#)

**Geiger D, Scherzer S, Mumm P, Stange A, Marten I, Bauer H, Ache P, Matschi S, Liese A, Al-Rasheid KAS, Romeis T, Hedrich R (2009) Activity of guard cell anion channel SLAC1 is controlled by drought-stress signaling kinase-phosphatase pair. Proceedings of the National Academy of Sciences of the United States of America 106: 21425-21430**

Google Scholar: [Author Only](#) [Title Only](#) [Author and Title](#)

**Gutschner M, Sobotta MC, Wabnitz GH, Ballikaya S, Meyer AJ, Samstag Y, Dick TP (2009) Proximity-based protein thiol oxidation by H<sub>2</sub>O<sub>2</sub>-scavenging peroxidases. The Journal of biological chemistry 284: 31532-31540**

Google Scholar: [Author Only](#) [Title Only](#) [Author and Title](#)

**Halliwell B, Whiteman M (2004) Measuring reactive species and oxidative damage in vivo and in cell culture: how should you do it and what do the results mean? Br J Pharmacol 142: 231-255**

Google Scholar: [Author Only](#) [Title Only](#) [Author and Title](#)

**He J, Duan Y, Hua D, Fan G, Wang L, Liu Y, Chen Z, Han L, Qu LJ, Gong Z (2012) DEXH box RNA helicase-mediated mitochondrial reactive oxygen species production in Arabidopsis mediates crosstalk between abscisic acid and auxin signaling. Plant Cell 24: 1815-1833**

Google Scholar: [Author Only](#) [Title Only](#) [Author and Title](#)

**Hsu P-K, Dubeaux G, Takahashi Y, Schroeder JI (2021) Signaling mechanisms in abscisic acid-mediated stomatal closure. The Plant journal : for cell and molecular biology 105: 307-321**

Google Scholar: [Author Only](#) [Title Only](#) [Author and Title](#)

**Hsu P-K, Takahashi Y, Munemasa S, Merilo E, Laanemets K, Waadt R, Pater D, Kollist H, Schroeder JI (2018) Abscisic acid-independent stomatal CO<sub>2</sub> signal transduction pathway and convergence of CO<sub>2</sub> and ABA signaling downstream of OST1 kinase. Proceedings of the National Academy of Sciences 115: E9971-E9980**

Google Scholar: [Author Only](#) [Title Only](#) [Author and Title](#)

**Jezek M, Blatt MR (2017) The Membrane Transport System of the Guard Cell and Its Integration for Stomatal Dynamics Plant Physiology 174: 487-519**

Google Scholar: [Author Only](#) [Title Only](#) [Author and Title](#)

**Kalyanaraman B, Darley-Usmar V, Davies KJA, Dennery PA, Forman HJ, Grisham MB, Mann GE, Moore K, Roberts LJ, Ischiropoulos H (2012) Measuring reactive oxygen and nitrogen species with fluorescent probes: challenges and limitations. Free Radical Biology and Medicine 52: 1-6**

Google Scholar: [Author Only](#) [Title Only](#) [Author and Title](#)

**Kelso GF, Porteous CM, Coulter CV, Hughes G, Porteous WK, Ledgerwood EC, Smith RAJ, Murphy MP (2001) Selective Targeting of a Redox-active Ubiquinone to Mitochondria within Cells: ANTIOXIDANT AND ANTIAPOPTOTIC PROPERTIES \*. Journal of Biological Chemistry 276: 4588-4596**

Google Scholar: [Author Only](#) [Title Only](#) [Author and Title](#)

**Klejchova M, Silva-Alvim FAL, Blatt MR, Alvim JC (2021) Membrane voltage as a dynamic platform for spatiotemporal signaling, physiological, and developmental regulation. Plant Physiology 185: 1523-1541**

Google Scholar: [Author Only](#) [Title Only](#) [Author and Title](#)

**Kwak JM, Mori IC, Pei ZM, Leonhardt N, Torres MA, Dangl JL, Bloom RE, Bodde S, Jones JD, Schroeder JI (2003) NADPH oxidase AtrbohD and AtrbohF genes function in ROS-dependent ABA signaling in Arabidopsis. Embo j 22: 2623-2633**

Google Scholar: [Author Only](#) [Title Only](#) [Author and Title](#)

**Lamaoui M, Jemo M, Datla R, Bekkaoui F (2018) Heat and Drought Stresses in Crops and Approaches for Their Mitigation. Frontiers in Chemistry 6**

Google Scholar: [Author Only](#) [Title Only](#) [Author and Title](#)

**Leshem Y, Levine A (2013) Zooming into sub-organelle localization of reactive oxygen species in guard cell chloroplasts during abscisic acid and methyl jasmonate treatments. Plant Signal Behav 8: doi: 10.4161/psb.25689**

Google Scholar: [Author Only](#) [Title Only](#) [Author and Title](#)

**Li N, Ragheb K, Lawler G, Sturgis J, Rajwa B, Melendez JA, Robinson JP (2003) Mitochondrial Complex I Inhibitor Rotenone Induces Apoptosis through Enhancing Mitochondrial Reactive Oxygen Species Production\*. Journal of Biological Chemistry 278: 8516-8525**

Google Scholar: [Author Only](#) [Title Only](#) [Author and Title](#)

**Li Q, Wang Y-J, Liu C-K, Pei Z-M, Shi W-L (2017) The crosstalk between ABA, nitric oxide, hydrogen peroxide, and calcium in stomatal closing of Arabidopsis thaliana. 72: 1140**

Google Scholar: [Author Only](#) [Title Only](#) [Author and Title](#)

**Ma Y, Szostkiewicz I, Korte A, Moes D, Yang Y, Christmann A, Grill E (2009) Regulators of PP2C phosphatase activity function as abscisic acid sensors. Science 324: 1064-1068**

Google Scholar: [Author Only](#) [Title Only](#) [Author and Title](#)



**Martin RE, Postiglione AE, Muday GK (2022) Reactive oxygen species function as signaling molecules in controlling plant development and hormonal responses. *Current Opinion in Plant Biology* 69: 102293**

Google Scholar: [Author Only](#) [Title Only](#) [Author and Title](#)

**Miller G, Schlauch K, Tam R, Cortes D, Torres MA, Shulaev V, Dangl JL, Mittler R (2009) The plant NADPH oxidase RBOHD mediates rapid systemic signaling in response to diverse stimuli. *Sci Signal* 2: ra45**

Google Scholar: [Author Only](#) [Title Only](#) [Author and Title](#)

**Mohammed F, Gorla M, Bisoyi V, Tammineni P, Sepuri NBV (2020) Rotenone-induced reactive oxygen species signal the recruitment of STAT3 to mitochondria. *FEBS Lett* 594: 1403-1412**

Google Scholar: [Author Only](#) [Title Only](#) [Author and Title](#)

**Muhammad Aslam M, Waseem M, Jakada BH, Okal EJ, Lei Z, Saqib HSA, Yuan W, Xu W, Zhang Q (2022) Mechanisms of Abscisic Acid-Mediated Drought Stress Responses in Plants. *Int J Mol Sci* 23**

Google Scholar: [Author Only](#) [Title Only](#) [Author and Title](#)

**Nietzel T, Elsässer M, Ruberti C, Steinbeck J, Ugalde JM, Fuchs P, Wagner S, Ostermann L, Moseler A, Lemke P, Fricker MD, Müller-Schüssele SJ, Moerschbacher BM, Costa A, Meyer AJ, Schwarzländer M (2019) The fluorescent protein sensor roGFP2-Orp1 monitors in vivo H<sub>2</sub>O<sub>2</sub> and thiol redox integration and elucidates intracellular H<sub>2</sub>O<sub>2</sub> dynamics during elicitor-induced oxidative burst in *Arabidopsis*. *New Phytologist* 221: 1649-1664**

Google Scholar: [Author Only](#) [Title Only](#) [Author and Title](#)

**Nilson SE, Assmann SM (2007) The control of transpiration. Insights from *Arabidopsis*. *Plant physiology* 143: 19-27**

Google Scholar: [Author Only](#) [Title Only](#) [Author and Title](#)

**Nishimura N, Sarkeshik A, Nito K, Park S-Y, Wang A, Carvalho PC, Lee S, Caddell DF, Cutler SR, Chory J, Yates JR, Schroeder JI (2010) PYR/PYL/RCAR family members are major in-vivo ABI1 protein phosphatase 2C-interacting proteins in *Arabidopsis*. *The Plant journal : for cell and molecular biology* 61: 290-299**

Google Scholar: [Author Only](#) [Title Only](#) [Author and Title](#)

**Noctor G, Foyer CH (2016) Intracellular Redox Compartmentation and ROS-Related Communication in Regulation and Signaling *Plant Physiology* 171: 1581-1592**

Google Scholar: [Author Only](#) [Title Only](#) [Author and Title](#)

**Palmer G, Horgan DJ, Tisdale H, Singer TP, Beinert H (1968) Studies on the respiratory chain-linked reduced nicotinamide adenine dinucleotide dehydrogenase. XIV. Location of the sites of inhibition of rotenone, barbiturates, and piericidin by means of electron paramagnetic resonance spectroscopy. *J Biol Chem* 243: 844-847**

Google Scholar: [Author Only](#) [Title Only](#) [Author and Title](#)

**Park SY, Fung P, Nishimura N, Jensen DR, Fujii H, Zhao Y, Lumba S, Santiago J, Rodrigues A, Chow TF, Alfred SE, Bonetta D, Finkelstein R, Provart NJ, Desveaux D, Rodriguez PL, McCourt P, Zhu JK, Schroeder JI, Volkman BF, Cutler SR (2009) Abscisic acid inhibits type 2C protein phosphatases via the PYR/PYL family of START proteins. *Science* 324: 1068-1071**

Google Scholar: [Author Only](#) [Title Only](#) [Author and Title](#)

**Pei ZM, Murata Y, Benning G, Thomine S, Klusener B, Allen GJ, Grill E, Schroeder JI (2000) Calcium channels activated by hydrogen peroxide mediate abscisic acid signalling in guard cells. *Nature* 406: 731-734**

Google Scholar: [Author Only](#) [Title Only](#) [Author and Title](#)

**Postiglione AE, Muday GK (2020) The Role of ROS Homeostasis in ABA-Induced Guard Cell Signaling. *Frontiers in Plant Science* 11**

Google Scholar: [Author Only](#) [Title Only](#) [Author and Title](#)

**Qi J, Song C-P, Wang B, Zhou J, Kangasjärvi J, Zhu J-K, Gong Z (2018) Reactive oxygen species signaling and stomatal movement in plant responses to drought stress and pathogen attack. *Journal of Integrative Plant Biology* 60: 805-826**

Google Scholar: [Author Only](#) [Title Only](#) [Author and Title](#)

**Qu Y, Song P, Hu Y, Jin X, Jia Q, Zhang X, Chen L, Zhang Q (2018) Regulation of stomatal movement by cortical microtubule organization in response to darkness and ABA signaling in *Arabidopsis*. *Plant Growth Regulation* 84: 467-479**

Google Scholar: [Author Only](#) [Title Only](#) [Author and Title](#)

**Ramón NM, Bartel B (2010) Interdependence of the peroxisome-targeting receptors in *Arabidopsis thaliana*: PEX7 facilitates PEX5 accumulation and import of PTS1 cargo into peroxisomes. *Molecular biology of the cell* 21: 1263-1271**

Google Scholar: [Author Only](#) [Title Only](#) [Author and Title](#)

**Reis J, Massari M, Marchese S, Ceccon M, Aalbers FS, Corana F, Valente S, Mai A, Magnani F, Mattevi A (2020) A closer look into NADPH oxidase inhibitors: Validation and insight into their mechanism of action. *Redox Biology* 32: 101466**

Google Scholar: [Author Only](#) [Title Only](#) [Author and Title](#)

**Rodrigues O, Reshetnyak G, Grondin A, Saijo Y, Leonhardt N, Maurel C, Verdoucq L (2017) Aquaporins facilitate hydrogen peroxide entry into guard cells to mediate ABA- and pathogen-triggered stomatal closure. *Proceedings of the National Academy***

**of Sciences 114: 9200-9205**

Google Scholar: [Author Only](#) [Title Only](#) [Author and Title](#)

**Scuffi D, Nietzel T, Di Fino LM, Meyer AJ, Lamattina L, Schwarzländer M, Laxalt AM, García-Mata C (2018) Hydrogen Sulfide Increases Production of NADPH Oxidase-Dependent Hydrogen Peroxide and Phospholipase D-Derived Phosphatidic Acid in Guard Cell Signaling. *Plant physiology* 176: 2532-2542**

Google Scholar: [Author Only](#) [Title Only](#) [Author and Title](#)

**Shanmugasundaram K, Nayak BK, Friedrichs WE, Kaushik D, Rodriguez R, Block K (2017) NOX4 functions as a mitochondrial energetic sensor coupling cancer metabolic reprogramming to drug resistance. *Nature Communications* 8: 997**

Google Scholar: [Author Only](#) [Title Only](#) [Author and Title](#)

**Sirichandra C, Gu D, Hu HC, Davanture M, Lee S, Djaoui M, Valot B, Zivy M, Leung J, Merlot S, Kwak JM (2009) Phosphorylation of the Arabidopsis AtrbohF NADPH oxidase by OST1 protein kinase. *FEBS Lett* 583: 2982-2986**

Google Scholar: [Author Only](#) [Title Only](#) [Author and Title](#)

**Suzuki N, Miller G, Morales J, Shulaev V, Torres MA, Mittler R (2011) Respiratory burst oxidases: the engines of ROS signaling. *Current Opinion in Plant Biology* 14: 691-699**

Google Scholar: [Author Only](#) [Title Only](#) [Author and Title](#)

**Swanson SJ, Choi WG, Chanoca A, Gilroy S (2011) In vivo imaging of Ca<sup>2+</sup>, pH, and reactive oxygen species using fluorescent probes in plants. *Annu Rev Plant Biol* 62: 273-297**

Google Scholar: [Author Only](#) [Title Only](#) [Author and Title](#)

**Takahashi Y, Zhang J, Hsu P-K, Ceciliato PHO, Zhang L, Dubeaux G, Munemasa S, Ge C, Zhao Y, Hauser F, Schroeder JI (2020) MAP3Kinase-dependent SnRK2-kinase activation is required for abscisic acid signal transduction and rapid osmotic stress response. *Nature Communications* 11: 12**

Google Scholar: [Author Only](#) [Title Only](#) [Author and Title](#)

**Tian S, Wang X, Li P, Wang H, Ji H, Xie J, Qiu Q, Shen D, Dong H (2016) Plant Aquaporin AtPIP1;4 Links Apoplastic H<sub>2</sub>O<sub>2</sub> Induction to Disease Immunity Pathways. *Plant Physiol* 171: 1635-1650**

Google Scholar: [Author Only](#) [Title Only](#) [Author and Title](#)

**Töldsepp K, Zhang J, Takahashi Y, Sindarovska Y, Hórák H, Ceciliato PHO, Koolmeister K, Wang Y-S, Vaahtera L, Jakobson L, Yeh C-Y, Park J, Brosche M, Kollist H, Schroeder JI (2018) Mitogen-activated protein kinases MPK4 and MPK12 are key components mediating CO<sub>2</sub>-induced stomatal movements. *The Plant Journal* 96: 1018-1035**

Google Scholar: [Author Only](#) [Title Only](#) [Author and Title](#)

**Ugalde JM, Fuchs P, Nietzel T, Cutolo EA, Homagk M, Vothknecht UC, Holuigue L, Schwarzländer M, Müller-Schüssele SJ, Meyer AJ (2021) Chloroplast-derived photo-oxidative stress causes changes in H<sub>2</sub>O<sub>2</sub> and EGSH in other subcellular compartments. *Plant Physiology* 186: 125-141**

Google Scholar: [Author Only](#) [Title Only](#) [Author and Title](#)

**Ugalde JM, Schlößer M, Dongois A, Martinière A, Meyer AJ (2021) The latest HyPe(r) in plant H<sub>2</sub>O<sub>2</sub> biosensing. *Plant Physiology* 187: 480-484**

Google Scholar: [Author Only](#) [Title Only](#) [Author and Title](#)

**Vermot A, Petit-Härtlein I, Smith SME, Fieschi F (2021) NADPH Oxidases (NOX): An Overview from Discovery, Molecular Mechanisms to Physiology and Pathology. *Antioxidants (Basel, Switzerland)* 10: 890**

Google Scholar: [Author Only](#) [Title Only](#) [Author and Title](#)

**Vishwakarma K, Upadhyay N, Kumar N, Yadav G, Singh J, Mishra RK, Kumar V, Verma R, Upadhyay RG, Pandey M, Sharma S (2017) Abscisic Acid Signaling and Abiotic Stress Tolerance in Plants: A Review on Current Knowledge and Future Prospects. *Frontiers in Plant Science* 8**

Google Scholar: [Author Only](#) [Title Only](#) [Author and Title](#)

**Wang WH, He EM, Chen J, Guo Y, Chen J, Liu X, Zheng HL (2016) The reduced state of the plastoquinone pool is required for chloroplast-mediated stomatal closure in response to calcium stimulation. *Plant J* 86: 132-144**

Google Scholar: [Author Only](#) [Title Only](#) [Author and Title](#)

**Watkins JM, Chapman JM, Muday GK (2017) Abscisic Acid-Induced Reactive Oxygen Species Are Modulated by Flavonols to Control Stomata Aperture. *Plant Physiology* 175: 1807-1825**

Google Scholar: [Author Only](#) [Title Only](#) [Author and Title](#)

**Watkins JM, Hechler PJ, Muday GK (2014) Ethylene-Induced Flavonol Accumulation in Guard Cells Suppresses Reactive Oxygen Species and Moderates Stomatal Aperture. *Plant Physiology* 164: 1707-1717**

Google Scholar: [Author Only](#) [Title Only](#) [Author and Title](#)

**Winterbourn CC (2014) The challenges of using fluorescent probes to detect and quantify specific reactive oxygen species in living cells. *Biochim Biophys Acta* 1840: 730-738**

Google Scholar: [Author Only](#) [Title Only](#) [Author and Title](#)

**Wu X, Qiao Z, Liu H, Acharya BR, Li C, Zhang W (2017) CML20, an Arabidopsis Calmodulin-like Protein, Negatively Regulates Guard Cell ABA Signaling and Drought Stress Tolerance. *Frontiers in plant science* 8: 824-824**

Google Scholar: [Author Only](#) [Title Only](#) [Author and Title](#)

**Xu Z, Jiang Y, Jia B, Zhou G (2016) Elevated-CO<sub>2</sub> Response of Stomata and Its Dependence on Environmental Factors. *Frontiers in Plant Science* 7**

Google Scholar: [Author Only](#) [Title Only](#) [Author and Title](#)

**Yang L, Zhang J, He J, Qin Y, Hua D, Duan Y, Chen Z, Gong Z (2014) ABA-mediated ROS in mitochondria regulate root meristem activity by controlling PLETHORA expression in Arabidopsis. *PLoS genetics* 10: e1004791-e1004791**

Google Scholar: [Author Only](#) [Title Only](#) [Author and Title](#)

**Yun B-W, Feechan A, Yin M, Saidi NBB, Le Bihan T, Yu M, Moore JW, Kang J-G, Kwon E, Spoel SH, Pallas JA, Loake GJ (2011) S-nitrosylation of NADPH oxidase regulates cell death in plant immunity. *Nature* 478: 264-268**

Google Scholar: [Author Only](#) [Title Only](#) [Author and Title](#)

**Zhang L, Takahashi Y, Hsu P-K, Kollist H, Merilo E, Krysan PJ, Schroeder JI (2020) FRET kinase sensor development reveals SnRK2/OST1 activation by ABA but not by MeJA and high CO<sub>2</sub> during stomatal closure. *eLife* 9: e56351**

Google Scholar: [Author Only](#) [Title Only](#) [Author and Title](#)

**Zhang X, Zhang L, Dong F, Gao J, Galbraith DW, Song CP (2001) Hydrogen peroxide is involved in abscisic acid-induced stomatal closure in *Vicia faba*. *Plant Physiol* 126: 1438-1448**

Google Scholar: [Author Only](#) [Title Only](#) [Author and Title](#)

**Zhou Q, Liu C, Liu W, Zhang H, Zhang R, Liu J, Zhang J, Xu C, Liu L, Huang S, Chen L (2014) Rotenone Induction of Hydrogen Peroxide Inhibits mTOR-mediated S6K1 and 4E-BP1/eIF4E Pathways, Leading to Neuronal Apoptosis. *Toxicological Sciences* 143: 81-96**

Google Scholar: [Author Only](#) [Title Only](#) [Author and Title](#)
